1 Platelet, erythrocyte, endothelial, and monocyte microparticles in coagulation  
2 activation and propagation  
3

4 E.N. Lipets<sup>1,2</sup>, O.A. Antonova<sup>3</sup>, O.N. Shustova<sup>3</sup>, K.V. Losenkova<sup>4</sup>, A.V. Mazurov<sup>3</sup>, F.I.  
5 Ataulakhanov<sup>1,2,5,6</sup>  
6

7 <sup>1</sup> Dmitry Rogachev National Medical Research Center of Pediatric Hematology, Oncology and  
8 Immunology, 1179971 Moscow, Russian Federation

9 <sup>2</sup> Center for Theoretical Problems of Physicochemical Pharmacology, Russian Academy of Sciences,  
10 119991 Moscow, Russian Federation

11 <sup>3</sup> National Medical Research Center for Cardiology, Russian Ministry of Health, 3<sup>rd</sup>  
12 Cherepkovskaya, 15a, 121552 Moscow, Russian Federation

13 <sup>4</sup> Medicity Research Laboratory, University of Turku, 20520 Turku, Finland

14 <sup>5</sup> Lomonosov Moscow State University, Faculty of Physics, 119991 Moscow, Russian Federation

15 <sup>6</sup> Moscow Institute of Physics and Technology, 141701 Dolgoprudny, Moscow Region, Russian  
16 Federation  
17  
18

19 *Background and objective:* For many pathological states, microparticles are supposed to be one of the  
20 causes of hypercoagulation. Although there are some indirect data about microparticles participation  
21 in coagulation activation and propagation, the integral hemostasis test Thrombodynamics allows to  
22 measure microparticles participation in these two coagulation phases directly by influence on the  
23 appearance of coagulation centers in plasma volume and on the rate of clot grown from surface with  
24 immobilized tissue factor.

25 *Methods:* Microparticles were obtained from platelets and erythrocytes by stimulation with SFLLRN  
26 and A23187, respectively, from monocytes, endothelial HUVEC culture and monocytic THP cell  
27 culture by stimulation with lipopolysaccharides. Microparticles were counted by flow cytometry and  
28 titrated in microparticle-depleted normal plasma in the Thrombodynamics test.

29 *Results:* Monocyte microparticles induced the appearance of clotting centres through the TF pathway  
30 at concentrations approximately 100-fold lower than platelet and erythrocyte microparticles, which  
31 activated plasma by the contact pathway. For endothelial microparticles, both activation pathways  
32 were essential, and their activity was intermediate. Monocyte microparticles induced plasma clotting  
33 by the appearance of hundreds of clots with an extremely slow growth rate, while erythrocyte  
34 microparticles induced the appearance of a few clots with a growth rate similar to that from surface  
35 covered with high-density tissue factor. Patterns of clotting induced by platelet and endothelial  
36 microparticles were intermediate. Platelet, erythrocyte and endothelial microparticles impacts on the  
37 rate of clot growth from the surface with tissue factor did not differ significantly within the 0-  
38  $200 \cdot 10^3/\text{ul}$  range of microparticles concentrations. However, at concentrations greater than  $500 \cdot 10^3/\text{ul}$ ,  
39 erythrocyte microparticles increased the stationary clot growth rate to significantly higher levels than  
40 do platelet microparticles or artificial phospholipid vesicles consisting of phosphatidylcholine and  
41 phosphatidylserine.

42 *Conclusion:* Microparticles of different origins demonstrated qualitatively different characteristics  
43 related to coagulation activation and propagation.

44

45

46 **Introduction**

47

48 Cell destruction or activation leads to microparticles (MPs) shedding. In the blood of normal  
49 donors, more than 80% of MPs are derived from platelets [1,2]. In pathological states the MPs  
50 concentration and origin may change.

51 There are a number of clinical works where the MPs concentration is shown to increase in  
52 pathological states associated with elevated thrombotic risk. Data are represented in corresponding  
53 reviews [3–8]. Many studies have also revealed elevated MPs concentration in both arterial and venous  
54 thrombosis. In acute coronary syndromes, the concentration of platelet MPs (PMPs) was found to be  
55 increased [9], as was the concentration of endothelial MPs (EMPs) [10–12]. Increased tissue factor-  
56 bearing MPs concentration [13,14] or activity [15,16] was associated with venous thromboembolic  
57 events in patients with cancer. At the same time, data about the MPs concentration in unprovoked  
58 venous thromboembolism (VTE) are very contradictory [5,17]. Recently, a number of prospective  
59 studies have appeared that examine the role of increased concentrations of MPs in cancer and recurrent  
60 thrombosis, but their results are also contradictory [5,17]. For other pathological states, prospective  
61 studies are few: EMPs concentration increase was an independent predictor of cardiovascular  
62 complications in patients with heart failure, type II diabetes, and end-stage renal failure [18–20].

63 Thus, although there is a considerable amount of data on the involvement of MPs in  
64 hypercoagulation, MPs concentration does not always reflect the risk of thrombotic complications.  
65 Therefore, the study of mechanisms of MPs influence on coagulation is of current interest. It is well  
66 known that coagulation can be activated by two pathways: external, when coagulation is triggered by  
67 tissue factor (TF), and internal, when factor XII is activated. This phase is called coagulation initiation.  
68 Activation of either pathway leads to the same reactions in the coagulation cascade – the clot growth  
69 phase. The process finishes with the termination phase – the protein C reactions. Phospholipid surfaces  
70 containing phosphatidylserine (PS) play an important role in these phases, especially in the  
71 propagation phase. MPs are able to increase the clot growth rate by providing such surfaces and by  
72 binding coagulation factors at higher concentrations than platelets [21–23]. MPs can also trigger

73 coagulation activation. TF-dependent activation from monocyte MPs (MMPs), obtained by monocyte  
74 stimulation with lipopolysaccharide (LPS), and a weaker contact activation from PMPs were shown  
75 in the works [24–26] in the thrombin generation test without the addition of activator. Contact  
76 activation from erythrocyte MPs (ErMPs) was shown in the works of van der Meijden [26] and Rubin  
77 et al. [27]. The stronger activation from TF-bearing MMPs and EMPs compared to TF-negative PMPs,  
78 ErMPs, and neutrophil MPs was demonstrated in the recalcification test in works [28–30]. The  
79 importance of PS in the procoagulant effect of PMPs [25] and the amplification of TF-initiated  
80 thrombin generation by PMPs [24] and ErMPs [27] indirectly indicate their participation in coagulation  
81 propagation. However, all these works were performed with homogeneous tests that do not allow for  
82 direct separation of the activation and propagation phases.

83 Thrombodynamics test allows us to observe the activation and propagation phases  
84 independently. The time of appearance and number of spontaneous activation centres characterize the  
85 ability of MPs to initiate coagulation. The MPs influence on the growth rate of clot triggered by surface  
86 with immobilized TF characterizes their impact on coagulation propagation. In this work, we compared  
87 MPs derived from almost all cells that are the major sources of MPs in blood (platelets, erythrocytes,  
88 endothelial cells and monocytes) in Thrombodynamics test. The comparison revealed the predominant  
89 impact of TF-bearing MMPs and EMPs on coagulation activation and ErMPs on coagulation  
90 propagation.

91

## 92 **Materials and methods**

### 93 *Preparation of microparticles of different cellular origins.*

94 Microparticles (MPs) produced by activated platelets, monocytes, human monocytic THP-1  
95 cells and endothelial cells (ECs) were prepared as described earlier in detail [29,31]. Platelets and  
96 monocytes were isolated from the blood of healthy volunteers. The study was approved by the ethics  
97 committee of Center for Theoretical Problems of Physicochemical Pharmacology and and written

98 informed consent was obtained from all donors. Washed platelets suspended at a concentration of 5 x  
99 10<sup>8</sup> platelets/ml in Tyrode/HEPES solution (137 mM NaCl, 2.7 mM KCl, 0.36 mM NaH<sub>2</sub>PO<sub>4</sub>, 0.1%  
100 dextrose, 1 mM MgCl<sub>2</sub>, 1 mM CaCl<sub>2</sub>, 0.35% BSA, 5 mM HEPES, pH 7.35) were activated by 10 μM  
101 thrombin receptor activating peptide (SFLLRN) for 10 min at 37°C.

102 For the isolation of monocytes, blood was centrifuged at 180 g for 10 min to obtain platelet-  
103 rich plasma, platelets were removed by centrifugation (1000 g, 15 min), and plasma was returned to  
104 the blood. Starch solution was added to agglutinate erythrocytes, and after their precipitation, the  
105 supernatant was layered over Histopaque1077 solution and centrifuged at 400 g for 30 min.  
106 Mononuclear leukocytes were washed from the “buffy coat” formed after this centrifugation;  
107 resuspended in RPMI 1640 medium containing 20 mM HEPES, 2 mM L-glutamine, 1 mM sodium  
108 pyruvate, penicillin (50 U/ml), streptomycin (100 μg/ml), and 10% fetal bovine serum; seeded into  
109 untreated 100-mm Petri dishes (25 x 10<sup>6</sup> cells/dish); and cultivated for 18 hours. Non-attached  
110 mononuclear cells were washed off, and adherent monocytes were activated by 1 μg/ml bacterial  
111 lipopolysaccharide (LPS) for 6 hours. Activation of monocytes by LPS (as well as activation of ECs  
112 and THP-1 cells – see below) was performed in a medium containing non-inactivated fetal bovine  
113 serum (instead of inactivated) as a source of LPS-binding protein. THP-1 cells were obtained from the  
114 American Type Culture Collection (ATCC, Bethesda, MD), cultured under standard conditions (RPMI  
115 1640 medium, containing 20 mM HEPES, 2 mM L-glutamine, 1 mM sodium pyruvate, penicillin (50  
116 U/ml), streptomycin (100 μg/ml), and 10% fetal bovine serum), and activated by 1 μg/ml LPS for 6  
117 hours.

118 ECs obtained from the human umbilical vein were cultured under standard conditions (DMEM  
119 medium containing 20 mM HEPES, 2 mM L glutamine, 1 mM sodium pyruvate, penicillin (50 U/ml),  
120 streptomycin (100 μg/ml), 10% heat inactivated fetal bovine serum, 200 μg/ml vascular endothelial  
121 growth factor, and 5 U/ml heparin) and activated by 1 μg/ml LPS for 12 hours.

122 Erythrocyte-derived MPs were prepared as described by Van Der Meijden et al. [32] with some  
123 modifications [30]. Blood from healthy volunteers was collected in 3.8% sodium citrate at a  
124 blood/anticoagulant ratio of 9/1. Blood was centrifuged at 180 g for 10 min. Platelet-rich plasma and  
125 the leukocyte “buffy coat” were removed, and 1 ml of erythrocytes was collected from the lower part  
126 of the erythrocyte pellet and diluted in 9 ml of HBS buffer. Erythrocytes were counted in an Abacus  
127 Junior B haematological analyser (Diatron Ltd., Austria) and washed 3 times in HBS at 2000 g for 15  
128 min. Erythrocytes were resuspended in HBS at a concentration of  $1 \times 10^9$ /ml, supplemented with 3  
129 mM  $\text{CaCl}_2$  and treated with 10  $\mu\text{M}$  A23187 calcium ionophore (Sigma-Aldrich, Inc., St. Louis, MI,  
130 USA) for 60 min at room temperature.

131 Activated platelets were spun down by double centrifugation at 2500 g for 15 min. Culture  
132 medium from activated monocytes and ECs and suspension of activated THP-1 cells were centrifuged  
133 at 400 g for 10 min and then at 2500 g for 15 min. Erythrocytes and their large fragments were removed  
134 by centrifugation at 2000 g for 15 min and at 2500 g. MPs were sedimented from obtained supernatants  
135 at 20,000 g for 30 min at 4°C and resuspended in filtered (filters Millex® - VV, 0.1  $\mu\text{m}$ ) HEPES-  
136 buffered saline (HBS, 10 mM HEPES, 140 mM NaCl, pH 7.4) containing 1% BSA (HBS/BSA).  
137 Suspensions contained in 1 ml MPs from  $5 \times 10^8$  platelets,  $1 \times 10^6$  monocytes, 1 or  $3 \times 10^6$  THP-1  
138 cells,  $1 \times 10^6$  ECs, and  $1 \times 10^9$  erythrocytes.

139 All MPs were frozen in liquid nitrogen, stored at -70°C for no longer than 6 months and thawed  
140 at 37°C just before use. Repeat freezing/thawing cycles were avoided. For procoagulant activity  
141 measurement, MPs were thawed, centrifuged for 30 min at 16,000 g, resuspended in buffer A (150  
142 mM NaCl, 2.7 mM KCl, 1 mM  $\text{MgCl}_2$ , 0.4 mM  $\text{NaH}_2\text{PO}_4$ , 20 mM HEPES, 5 mM glucose, 0.5%  
143 bovine serum albumin, pH 7.4, filtered through a 0.22- $\mu\text{m}$  membrane) and concentrated to the  
144 necessary extent.

145 *Counting of microparticles*

146                   MPs were thawed at 37°C, and 5 to 45 µl of suspension was added to 300 µl of annexin  
147 V binding buffer (Becton Dickinson, BD Bioscience, San Jose, CA, USA). After the addition of 2.5  
148 µl of annexin V-FITC (Becton Dickinson, BD Bioscience, San Jose, CA, USA), the suspension was  
149 incubated in the dark for 30 min at room temperature. Control probes contained filtered HBS buffer  
150 without MPs. Standard beads with a diameter of 3 µm and known concentration (MP Count Beads,  
151 BioCytex, Stago, France) were used for counting calibration. Fifteen microliters of these beads was  
152 added to the analysed probes. Standard beads with a diameter of 1 µm (Flow cytometry Sub-Micron  
153 Size Reference Kit, Invitrogen, Life Technologies Corp., Carlsbad, CA, USA) were used for sizing  
154 calibration. MPs were analysed and counted in a FACS Canto II flow cytometer (Becton Dickinson,  
155 BD Bioscience, San Jose, CA, USA). Events were acquired at a low rate mode (less than 3000 events  
156 per sec). Data acquisition and analysis were performed using CELL Quest™ software (Becton  
157 Dickinson, BD Biosciences, San Jose, CA, USA). The noise threshold was set up in the FITC  
158 fluorescence channel (200 arbitrary units, a.u.). Events above this threshold were gated and counted in  
159 the SSC/FSC (side scattering/forward scattering) window in the size gate < 1 µm (size calibration  
160 beads). Analysis was performed until 1000 events were acquired in the gate for 3-µm counting beads.  
161 Examples of MPs analysis and counting are presented in Fig. 1. The concentration of MPs in probes  
162 was calculated as follows: number of MPs in 1 µl = (number of events in the gate < 1 µm) x (number  
163 of counting beads in 1 µl) x (dilution coefficient) / 1000. The dilution coefficient was applied upon the  
164 addition of different volumes of analysed MPs (from 5 to 45 µl) and counting beads (15 µl). The  
165 number of events (< 1 µm) in 1 µl of negative control probes (HBS buffer without MPs) was subtracted  
166 from the number of MPs in 1 µl. For all types of MPs, we observed a linear relationship between the  
167 number of counted MPs and the volume of analysed probe (5-45 µl). In preliminary experiments, we  
168 noticed that a much lower number of MPs were counted when the noise threshold was set up in the  
169 SSC or FSC channel, which was presumably due to the elimination of a significant fraction of small  
170 MPs from the analysis. We also noticed that the percentage of annexin V-positive MPs (above the

171 threshold of the negative control) significantly varied in MPs of different cellular origins (for  
172 examples, see Fig. 1). The smallest percentage was detected for MPs from erythrocytes (lower than  
173 10%), intermediate percentages for MPs from platelets (15-20%), higher percentages for MPs from  
174 monocytes and THP-1 cells (approximately 30%), and the highest percentage for MPs from ECs (up  
175 to 40%). Because of these variations, we counted not only annexin V-positive but all MPs and used  
176 these counts in comparative studies of their coagulation activity.

177

178 **Fig. 1.** Analysis and counting of MPs of different cellular origins by flow cytometry on a FACS Canto  
179 II. The noise threshold was set up in the FITC fluorescence channel (200 a.u) (B1-B5). A1, B1 –  
180 filtered HBS buffer without MPs (negative control); A2, B2 – MPs from erythrocytes; A3, B3 – MPs  
181 from platelets; A4, B4 – MPs from THP-1 cells; A5, B5 – MPs from ECs. Annexin V-FITC was added  
182 to all probes. All events above the FITC fluorescence threshold (200 a.u) (gate P3 in B1-B5) were  
183 counted in the SSC/FSC window (A1-A5) in the size gate  $< 1 \mu\text{m}$  (gate P4). After subtracting the  
184 events in the negative control, all events in this gate were considered MPs. Gate P1 (A1-A5) – size  
185 calibration beads ( $1 \mu\text{m}$ ), gate P2 (A1-A5) – counting beads ( $3 \mu\text{m}$ ). Gate P4 (B1-B5) annexin V-  
186 positive events above the threshold set up in the negative control in the FITC fluorescence channel.  
187 Percentages of annexin V-positive events are presented for each type of MPs. Analysis of MPs from  
188 monocytes is not shown since they have approximately the same distribution pattern as MPs from  
189 monocytic THP-1 cells (approximately 30% of annexin V-positive events).

190

### 191 *Preparation of phospholipid vesicles*

192 Artificial phospholipid vesicles composed of 80% phosphatidylcholine (PC) and 20%  
193 phosphatidylserine (PS) or 15% PS and 85% PS or 10% PS and 90% PC were prepared according to  
194 the protocol recommended by Avanti Polar Lipids with minor changes. Phospholipids dissolved in  
195 chloroform were transferred into a round-bottomed flask, dried for 30 minutes under a nitrogen current



196 to eliminate chloroform, and hydrated in 20 mM HEPES, 140 mM NaCl (pH 7.5) buffer for 30 minutes  
197 at 55°C on a shaker. The resulting solution was treated with three freeze-thaw cycles, heated to 55°C,  
198 and forced through the extruder membrane. The pore diameter was 100 nm.

#### 199 *Plasma preparation*

200 Blood from healthy donors was collected into Greiner Bio-One Vacuette or Sarstedt Monovette  
201 citrate tubes. The first tube collected after the venipuncture was discarded. Platelet-free plasma was  
202 obtained by two-stage centrifugation: 15 min at 1600 g and 5 min at 10,000 g. MPs were removed by  
203 centrifugation for 30 min at 16,000 g. Experiments were carried out on unfrozen plasma of individual  
204 donors.

#### 205 *Thrombodynamics test*

206 The procoagulant activity of MPs was studied using the Thrombodynamics test. The assay is  
207 described in [33–35]. A total of 107  $\mu$ l of MP-poor plasma was supplemented with 13  $\mu$ l of MPs in  
208 different concentrations or buffer A. The assay was performed using a Thrombodynamics Analyzer  
209 and Thrombodynamics kit (LLC HemaCore, Moscow, Russia): 120  $\mu$ l of plasma supplemented with  
210 MPs was transferred to an Eppendorf tube containing corn trypsin inhibitor (CTI), incubated for 3 min  
211 at 37°C and then transferred to an Eppendorf tube containing Ca salt. Recalcified plasma was placed  
212 into the chamber. An insert with immobilized TF was immersed into plasma. Clot growth began from  
213 the TF-covered surface. It was monitored by light scattering using a digital camera for 60 min. Clot  
214 images were used to determine the clot size, measured as the distance from the edge of the activator to  
215 the point where the light scattering intensity was half of the maximal light scattering of the clot at the  
216 activator. Clot growth rates were determined as the slope of the clot size dependence on time within  
217 the interval from 2 to 6 min after the beginning of clot formation (initial rate,  $V_i$ ) and 15 to 25 min  
218 (stationary rate,  $V_{st}$ ).

219 The appearance of clotting centres within a distant from the activator (spontaneous clots) was  
220 characterized by  $T_{sp}$ , the time when the plasma volume excluding clot growing from the activator  
221 clotted to 5% (Fig. 2).

222

223 **Fig. 2.** Design of the Thrombodynamics assay. A. Typical images of growing fibrin clot in normal  
224 platelet-free plasma and in plasma supplemented with microparticles. Coagulation is activated by  
225 immobilized TF (on the top), and the fibrin clot grows into the bulk of the plasma. When plasma is  
226 supplemented with microparticles, spontaneous clots in the bulk of the plasma appear. The scale bar  
227 is 2 mm. B. Clot size dependence on time, definition of initial clot growth rate,  $V_i$ , and stationary clot  
228 growth rate,  $V_s$ . C. Dependence on time of the percentage of spontaneous clot area of the whole  
229 chamber area excluding walls and clot grown from activator ( $T_{sp}$  definition).

230

231 To calculate a number of spontaneous clots dependence on time, the photos were converted  
232 into binary format. Black colour corresponded to regions with a liquid state of plasma, and white colour  
233 corresponded to regions with fibrin clots. The transition occurred when the light scattering intensity at  
234 a point became higher than half of the maximal light scattering intensity of a clot growing from the  
235 activator. The time point when a spontaneous clot area exceeded an arbitrarily chosen value of  $9 \mu\text{m}^2$   
236 was defined as the time of spontaneous clot appearance.

237 To characterize the growth of individual clots, we introduced the following parameters: lag-  
238 time ( $t_{lag}$ ), maximal rate of intensity increase ( $V_{Imax}$ ), and the rate of coagulation front propagation  
239 from a spontaneous clot centre ( $V_{sc}$ ). Spontaneous clots induced by low concentrations of MMPs and  
240 EMPs terminated growing early, and their light scattering intensity often did not reach half of the  
241 maximal light scattering intensity of a clot growing from activator. Therefore, we defined the lag-time  
242 as the time when the light scattering intensity in the centre of a spontaneous clot reached 2000 arbitrary  
243 units.  $V_{Imax}$  was defined as the maximum of the time derivative of light scattering intensity in a

244 spontaneous clot centre. The size of the spontaneous clot was defined as the distance between the  
245 spontaneous clot centre and the coordinate, where the light scattering intensity from the clot was half  
246 the intensity at the centre of the clot. The clot size dependence on time was calculated until fusion of  
247 the clot with a neighbouring clot or until the end of the test.  $V_{sc}$  was calculated as the linear  
248 approximation of the last 10 min of clot size dependence on time.

#### 249 *Preparation of fVIIai*

250 The fVIIa inactivation method was carried out as described in [36] with modifications. FVIIa  
251 was incubated with PPACK for 60 min at 4°C at a 1:2 molar ratio. The obtained fVIIai was separated  
252 from PPACK by dialysis against Tris buffer. The final concentration of fVIIai was measured on a  
253 spectrophotometer by absorption at 280 nm. A concentration of 50 nM fVIIai completely suppressed  
254 clotting caused by 0.25 pM TF in a 2-hour experiment. Complete inactivation of fVIIa was verified  
255 with a chromogenic assay. The FVIIai sample and calibration fVIIa samples  $10 \div 1.25$  pM dissolved  
256 in Ca solution were incubated for 5 min with TF, mixed with fX and incubated for 15 min. The reaction  
257 was stopped by EDTA addition, and the amount of fXa gained was evaluated by the cleavage rate of  
258 the substrate S 2765. PPACK removal was checked by the influence of fVIIai solution on fluorogenic  
259 substrate cleavage by thrombin.

#### 260 *Determining the activation pathway from MPs*

261 To determine the activation pathway from MPs, the time of spontaneous clots  
262 appearance ( $T_{sp}$ ) in plasma supplemented with MPs of different types was measured without any  
263 inhibitors, with the addition of 200 µg/ml CTI, 100 nM VIIai (TF pathway inhibitor) or both inhibitors.

264

## 265 **Results**

266

#### 267 *MPs of different origins in coagulation activation*

268 The ability of MPs to activate coagulation can be observed in the Thrombodynamics test by the  
269 appearance of clotting centres at a distance from the activating surface. These clots are called  
270 spontaneous because their appearance is caused by material in the plasma and not by activation with  
271 substances added in the test.

272 MPs of different origins were titrated in MP-depleted plasma in the Thrombodynamics test.  
273 MP concentrations varied from 0 to the value at which clotting centres in the plasma volume appeared  
274 within 60 min. Spontaneous clotting parameters induced by MPs of different origins turned out to have  
275 both quantitative and qualitative differences.

276 The minimal MPs concentrations causing spontaneous clotting could serve as the measure of  
277 MPs activity in coagulation activation. The data for MPs of different origins are represented in Table  
278 1. The activity of MMPs from cells of normal donors was the highest. The activity of MPs from  
279 monocyte culture THP cells was 4-fold lower. EMPs had activity 25-fold less than that of MMPs.  
280 PMPs and ErMPs were 100-fold less. Although the deviation between the activity of MPs samples  
281 obtained from cells of different donors reached from 48% for PMPs to 98% for ErMPs, all the  
282 differences between MPs activity were significant ( $p < 0.05$ ), except for the difference between PMPs  
283 and ErMPs.

284

285 Table 1. The minimal MPs concentrations inducing the appearance of clotting centres. For analysis of  
286 significant differences, the Mann-Whitney test was used. \*  $p < 0.05$  – significant difference with PMPs,  
287 \*\*  $p < 0.05$  – significant difference with ErMPs, \*\*\*  $p < 0.05$  – significant difference with EMPs, #  
288  $p < 0.05$  – significant difference with THP MPs, \$  $p < 0.05$  – significant difference with MMPs. N – the  
289 number of MPs samples tested.

|         | MP concentration inducing the appearance of clotting centres,<br>$10^3 / \mu\text{l}$ mean $\pm$ sd | N |
|---------|-----------------------------------------------------------------------------------------------------|---|
| PMPs    | 510 $\pm$ 250 <sup>***,#,\$</sup>                                                                   | 7 |
| ErMPs   | 790 $\pm$ 780 <sup>***,#,\$</sup>                                                                   | 7 |
| EMPs    | 180 $\pm$ 40 <sup>*,**,#,\$</sup>                                                                   | 5 |
| MMPs    | 7,3 $\pm$ 4,8 <sup>*,**,**,#</sup>                                                                  | 5 |
| THP MPs | 30 $\pm$ 18 <sup>*,**,**,\$</sup>                                                                   | 6 |

290

291 Even more evident than the minimal MPs concentration causing spontaneous clots, the  
 292 difference in the MPs activity was observed in the ratio of the number of coagulation centres formed  
 293 within 1 hour to the total number of MPs in the chamber. This parameter depended on MPs  
 294 concentrations; however, the differences between MPs of different origins were so great that even the  
 295 range from the 25th to the 75th percentile from the complete range of this ratio change at different  
 296 concentrations of MMPs, EMPs and PMPs did not intersect (Table 2). For the most active MMPs, less  
 297 than 0.7 per thousand MMPs caused a visible centre within 1 hour. Less than 1/10<sup>5</sup> EMPs and 1/10<sup>6</sup>  
 298 PMPs or ErMPs induced a separate clot.

299

300 Table. 2. The ratio of spontaneous clots number to the number of MPs in the chamber volume. The  
 301 number of MPs in the chamber volume was estimated based on MPs concentrations and considering  
 302 the plasma volume where spontaneous clots were counted to be equal to 70  $\mu\text{l}$ . N – the number of tests  
 303 included in the calculation. The ranges of values in the table are from the 25th to 75th percentile.

|       | N of clots at 60 min / N of MP,<br>$1/10^6$ | N  |
|-------|---------------------------------------------|----|
| PMPs  | 0.07-0.44                                   | 13 |
| ErMPs | 0.05-0.16                                   | 9  |
| EMPs  | 1.4-4.5                                     | 22 |
| MMPs  | 100-354                                     | 12 |

304

305 One of the reasons for the activity difference could be TF on the MPs surfaces. We determined  
306 the activation pathway from MPs by the changes in the time of spontaneous clots appearance  $T_{sp}$  in  
307 recalcified plasma containing MPs of different origins when inhibitors of contact activation (CTI) or  
308 the TF pathway were added. The test showed that the most active MMPs and EMPs bear TF on their  
309 surfaces (Fig. 3). In addition to TF, contact activation made a significant contribution to EMPs activity.  
310 Less active ErMP and PMP activate coagulation through the contact pathway only (Fig. 3).

311

312 **Fig. 3.** Activation pathway from MPs. Photos at 60 min of plasma supplemented with MPs of  
313 different origins in the Thrombodynamics test without any inhibitors, with 100 nM VIIai (TF pathway  
314 inhibitor), with 200  $\mu$ g/ml CTI (contact pathway inhibitor) or both inhibitors. MPs were supplemented  
315 at arbitrary concentrations, which induced the appearance of clotting centres within 10-20 min in  
316 samples without inhibitors. That was optimal for checking inhibitor effects. B. Mean  $\pm$  sd of  $T_{sp}$  in  
317 plasma supplemented with MPs without inhibitors and with one or both inhibitors. Three repeats were  
318 carried out for PMPs and THP MPs and two repeats for ErMPs, EMPs and MMPs. PMPs – platelet  
319 microparticles, ErMPs – erythrocyte microparticles, EMPs – endothelial microparticles, THP MPs –  
320 microparticles from monocyte culture, MMPs – monocyte microparticles.

321

322 Since the minimal concentrations leading to the appearance of spontaneous clots for MPs of  
323 different origins differ up to a hundred times, the typical patterns of spontaneous clots formation are  
324 presented in individual concentrations for each type of MPs (Fig. 4, S1 Movie). Typical coagulation  
325 patterns had qualitative differences in the number, appearance and growth rate of spontaneous clots.

326

327 **Fig. 4.** Photos of growing clot and typical patterns of spontaneous clotting induced by MPs of  
328 different origins. As MPs of different origins induce spontaneous clotting at 100-fold different  
329 concentrations, the photos represented at arbitrary concentrations at which the patterns of clotting  
330 centre appearance were well distinguished within 60 min. The MPs concentrations in assays in photos  
331 were as follows: PMPs,  $627 \cdot 10^3$  1/ $\mu$ l; ErMPs,  $500 \cdot 10^3$  1/ $\mu$ l; EMPs,  $480 \cdot 10^3$  1/ $\mu$ l; THP MPs,  $132 \cdot 10^3$   
332 1/ $\mu$ l; and MMPs,  $132 \cdot 10^3$  1/ $\mu$ l.

333

334 The time dependences of the number of clotting centres induced by MPs of different origins  
335 are represented in Fig. 5. The increment of the clot number was normalized to the fraction of free frame  
336 area so that the decrease in the rate of clotting centre appearance as a result of volume occupation by  
337 clots that appeared earlier would not distort the dependence. The scale of the ordinate axis in Fig. 5 is  
338 different because the number of spontaneous clots induced by MPs of different origins within 1 hour  
339 differed by more than 100-fold. According to available data for PMPs and ErMP, the form of the clot  
340 number dependence on time is difficult to determine. For MMPs and EMPs, this dependence was  
341 exponential. It is natural to assume that the time of appearance of a spontaneous clot is determined by  
342 the local concentration of the activator in its centre. If an individual MP triggered a clot, the time of  
343 appearance of the first five centres ( $t_{N=5}$ ) should not depend on the MPs concentration. For ErMP, the  
344 assumption was confirmed (Fig. S1 B). For PMPs and EMPs,  $t_{N=5}$  tended to decrease with increasing  
345 MPs concentration, but the data were not sufficient for a definite answer (Fig. S1 A, C). For MMPs,  
346  $t_{N=5}$  decreased inversely with MMPs concentration (Fig. S1 D). This indicates an increase in the

347 probability of clot formation with a decrease in the distance between MMPs. The assumption about  
348 the interaction between MPs is also supported by the fact that for all types of MPs in experiments  
349 where more than 10 centres were formed within 1 hour, the increase in the number of centres was  
350 accelerated with time.

351

352 **Fig. 5.** Time dependence of the number of clotting centres induced by MPs of different origins.  
353 The number of clotting centres was recalculated to represent what it would have been if the plasma  
354 volume had not been decreased by clots that appeared earlier (N corrected). Clotting was induced in  
355 normal MP-depleted plasma by supplementation with (A) platelet MPs, (B) erythrocyte MPs, (C)  
356 endothelial MPs, and (D) monocyte MPs. Different curves correspond to different MPs samples and  
357 different concentrations as described in the legends.

358

359 The dependences of the number of clotting centres formed within 60 min on concentrations are  
360 represented in Fig. 6. ErMPs in minimal concentrations that induce spontaneous clotting led to the  
361 appearance of few spontaneous clots growing at a rate near the rate of clot growth from the surface  
362 with immobilized TF (activator). On average, this rate was  $48 \pm 14$   $\mu\text{m}/\text{min}$ . The number of spontaneous  
363 clots increased along with the ErMP concentration, but because of their fast growth, they rapidly  
364 occupied all the free chamber volume, and in our experiments, the maximal number of spontaneous  
365 clots formed within 1 hour did not exceed 17 (Fig. 6 B). Clots induced by PMPs grew at a mean rate  
366 of  $14 \pm 8$   $\mu\text{m}/\text{min}$ . As a result, more clots could appear at high PMPs concentrations before full  
367 coagulation (Fig. 6 A). MMPs with concentration increase did not cause coagulation at first then  
368 approximately ten clots appeared. The growth rate of these clots almost stopped within the first 10 –  
369 15 min, and the whole plasma volume did not clot. With a further slight increase in concentration,  
370 there was a sharp switch to the formation of several hundred clots (Fig. 6 D) growing at a relatively  
371 low but significantly nonzero rate of  $9 \pm 4$   $\mu\text{m}/\text{min}$  on average. In this case, plasma coagulated



372 completely and not only because of individual clots propagation in space but also because of  
373 coagulation in the whole volume. EMPs caused spontaneous coagulation patterns qualitatively similar  
374 to MMPs, but the dependence of the number of spontaneous clots on concentration was considerably  
375 smoother (Fig. 6 C), and at high EMPs concentrations, much higher clots growth rates were achieved.  
376

377 **Fig. 6.** The dependence of the number of clotting centres formed within 60 min on  
378 concentration. Clotting was induced in normal MP-depleted plasma by supplementation with (A)  
379 platelet MPs, (B) erythrocyte MPs, (C) endothelial MPs, and (D) monocyte MPs.

380 As described above, the distribution of fibrin clots in space in this method is reflected by the  
381 light scattering intensity profile. Analysis of the time dependences of light scattering intensity profiles  
382 allows the introduction of quantitative characteristics of spontaneous clots. The corresponding  
383 dependences when MPs of different origins were supplemented to plasma are represented in Fig. 7.  
384 PMPs and ErMPs induced clotting in separate centres only. The light scattering intensity in the centres  
385 of clots increased along with fibrin polymerization. The area with high light scattering intensity grew  
386 as the clot propagated in space (Fig. 7 A, D). The rate of light scattering increase in the clot centre was  
387 characterized by the maximal rate  $VI_{max}$  and the coagulation front propagation from centres of  
388 spontaneous clots with the rate  $V_{sc}$ .  $VI_{max}$  and  $V_{sc}$  were calculated as described in the materials and  
389 methods. If all the fibrinogen cleaved to fibrin within the test time, the light scattering intensity in the  
390 clot centre reached a plateau and only further propagation in space continued. The maximal light  
391 scattering intensity in a clot centre reached by 60 min was indicated as  $I_{max}$ . With increasing MMPs  
392 and EMPs concentrations, qualitative changes in the parameters of spontaneous clots growth were  
393 observed. Therefore, the time dependences of the light scattering intensity profiles of spontaneous clots  
394 induced by MMPs and EMPs are given for two concentrations, conditionally “low” and “high”. In  
395 plasma containing MMPs and EMPs in “high” concentrations, coagulation began in the whole volume  
396 at some point in time. That was expressed as the background increase in light scattering intensity (Fig.

397 7 C, F). At conditionally “low” MMPs concentrations, distinct clotting centres appeared, the growth  
398 of which rapidly stopped (Fig. 7 E). EMPs were especially heterogeneous: in the same sample at  
399 conditionally “low” concentration, coagulation propagated from some centres and practically stopped  
400 from others (Fig. 7 B).

401

402 **Fig. 7.** The light scattering intensity profiles of spontaneous clots induced by MPs of different  
403 origins. Clotting was induced in normal MP-depleted plasma by supplementation of (A) platelet MPs,  
404 (B) endothelial MPs in conditionally “low” concentrations, (C) endothelial MPs in conditionally  
405 “high” concentrations, (D) erythrocyte MPs, (E) monocyte MPs in conditionally “low” concentrations,  
406 and (F) monocyte MPs in conditionally “high” concentrations. The time interval between profiles is 5  
407 min.

408

409 VI max is by some approximation proportional to the rate of fibrin formation and consequently  
410 to the thrombin concentration (at the time interval until complete polymerization). Therefore, VI max  
411 indirectly indicates activation strength. VI max in the centres of spontaneous clots induced by any type  
412 of MPs was considerably less than VI max at the surface with immobilized TF (activator) (Fig. 8). At  
413 the same time, I<sub>max</sub> in the centre of spontaneous clots could exceed I<sub>max</sub> at activator by 1.4 – 1.7-  
414 fold (Fig. 8, S2). The increase in maximal light scattering intensity of a clot as a result of a diameter  
415 increase of fibrin fibrils when the thrombin concentration is decreased was theoretically predicted and  
416 experimentally shown in the article [37]. The VI max deviation in one test consisted of 33% for PMPs  
417 and 60% for MMPs. The VI max changes with concentration were less than the deviation within a test  
418 for all types of MPs except for EMPs (Fig. S3), which gives justification for a rough approximation to  
419 compare the average VI max for all clots formed at different concentrations. The comparison is shown  
420 in Fig. 9 A. The mean VI max of ErMPs is significantly higher than the mean VI max of the other  
421 types of MPs, and for MMPs, it is significantly lower. PMPs and EMPs did not differ significantly in

422 this parameter. However, the VI max in the centre of spontaneous clots induced by any type of MPs  
423 was not higher than the 0.1 – 0.15 VI max at activator (Fig. 9 B). Consequently, the thrombin  
424 concentration in the centres of spontaneous clots was 7–10-fold lower than that at activator.

425

426 **Fig. 8.** Time dependence of light scattering intensity in the centre of spontaneous clots and  
427 clots growing from activator. Clotting was induced in normal MP-depleted plasma by supplementation  
428 of (A) platelet MPs, (B) endothelial MPs in conditionally “low” concentrations, (C) endothelial MPs  
429 in conditionally “high” concentrations, (D) erythrocyte MPs, (E) monocyte MPs in conditionally “low”  
430 concentrations, and (F) monocyte MPs in conditionally “high” concentrations. Time dependence of  
431 the light scattering intensity of clots growing from activator are drawn with dashed lines, and those of  
432 the light scattering intensity in the centre of spontaneous clots are drawn with solid lines.

433

434 **Fig. 9.** The maximal rate of increase of light scattering intensity in the centre of spontaneous  
435 clots and its ratio to the maximal rate of increase of light scattering intensity of clots growing from  
436 activator. (A) The mean maximal rate of light scattering intensity increase in the centre of spontaneous  
437 clots growth. (B) Ratio of the mean maximal rates of light scattering intensity increase in the centre of  
438 spontaneous clots growth to the maximal rate of light scattering intensity increase of clots growing  
439 from activator. Dots correspond to different MP samples and different concentrations. Tables under  
440 histograms contain significance levels of corresponding parameter differences between MP of different  
441 origin according to Mann – Whitney test.

442

443 If the increment in light scattering intensity in the centre of a clot depends on thrombin formed  
444 in the immediate vicinity of the activator, the clot propagation depends on thrombin formed at a  
445 distance from the activator as a result of positive feedbacks work. In this way, the parameters VI max  
446 and Vsc are largely determined by different reactions. The first characterizes the activation phase, and

447 the second characterizes the propagation phase. The spontaneous clots size in most cases depended  
448 linearly on time (Fig. 10). In some cases, the linear region is preceded by a smooth acceleration from  
449 zero rate. When the light scattering intensity background is rising, the growth rate was accelerating  
450 (Fig. 10 C), although the consideration of the corresponding region as the growth of a separate clot  
451 was not quite correct.

452

453 **Fig. 10.** Time dependences of clot growing from activator and spontaneous clots sizes. Clotting was  
454 induced in normal MP-depleted plasma by supplementation of (A) platelet MPs, (B) endothelial MPs  
455 in conditionally “low” concentrations, (C) endothelial MPs in conditionally “high” concentrations, (D)  
456 erythrocyte MPs, (E) monocyte MPs in conditionally “low” concentrations, and (F) monocyte MPs in  
457 conditionally “high” concentrations. Time dependences of clots growing from activator sizes are  
458 drawn with dashed lines, and those of spontaneous clot sizes are drawn with solid lines.

459

460 Growth rates were, on average, increased with concentrations (Fig. S4,) and it would be  
461 preferable to compare the growth rates for MPs of different origins at equal concentrations. However,  
462 the growth rates of clots induced by TF-bearing MPs cannot be calculated at the concentrations that  
463 PMPs and ErMPs begin to initiate clotting, and at concentrations that allow calculating the rates of  
464 clots induced by TF-bearing MPs, PMPs and ErMPs do not initiate coagulation. Thus, we represent  
465 here a comparison of the parameters of clots induced by MPs of different origins rather than the MPs  
466 themselves. In the concentration ranges where clots growth rates could be calculated, changes in the  
467 mean rates with the concentrations were less than deviations within one test (the same as for VI max);  
468 therefore, we considered the average for different concentrations data (Fig. 11 A). The mean Vsc of  
469 clots induced by PMPs and EMPs did not differ significantly. The mean Vsc of clots induced by MMPs  
470 was significantly less than that induced by other MPs, and for ErMPs, it was significantly higher than

471 that induced by others. Different phospholipid concentrations due to large differences in MPs  
472 concentrations could be one of the reasons for MMPs and ErMPs standing out.

473 It was previously shown that in the presence of a sufficient amount of phospholipid surface in  
474 the plasma and activation higher than the threshold, the steady-state clot growth rate over a wide range  
475 does not depend on the TF concentration [38], type of TF-bearing cells [39] or the method of activation  
476 [40]. One could expect that the growth rates of spontaneous clots and the clot from the activator will  
477 be close. However,  $V_{sc}$  deviation within one test consisted on average of 4  $\mu\text{m}/\text{min}$  (33%), 8  $\mu\text{m}/\text{min}$   
478 (22%), 7  $\mu\text{m}/\text{min}$  (76%), and 2.5  $\mu\text{m}/\text{min}$  (84%) for PMPs, ErMPs, EMPs, and MMPs, respectively.  
479 Only spontaneous clots induced by ErMPs grew at approximately the same rate as the clot from the  
480 activator. The medians of the  $V_{sc}$  to  $V_s$  ratio were 0.5, 0.93, 0.22 and 0.09 for PMPs, ErMPs, EMPs,  
481 and MMPs, respectively (Fig. 11 B). The Spearman correlation coefficients between the growth rates  
482 of spontaneous clots and clot from activator were 0.36 ( $p=0.024$ ) for PMPs, 0.74 ( $p=3 \cdot 10^{-15}$ ) for  
483 ErMPs, 0.78 ( $p=5 \cdot 10^{-23}$ ) for EMPs, and 0.61 ( $p=3 \cdot 10^{-10}$ ) for MMPs.

484

485 **Fig. 11.** The rate of coagulation front propagation from centres of spontaneous clots induced  
486 by MPs of different origin and its ratio to the clot growth rate from activator. (A) Mean rate of  
487 coagulation front propagation from centres of spontaneous clots. (B) Mean ratio of the rate of  
488 coagulation front propagation from the centres of spontaneous clots to the clot growth rate from the  
489 activator. Dots correspond to different MPs samples and different concentrations. Tables under  
490 histograms contain the significance levels of corresponding parameter differences between MP of  
491 different origins according to the Mann–Whitney test.

492

493 One could assume that any MPs except for ErMPs induce clotting at concentrations that did  
494 not supply enough phospholipids to plasma to support coagulation propagation efficiently. ErMPs  
495 induce spontaneous clotting at the highest concentration and consequently the highest phospholipid

496 concentration. In the case of lipid deficiency, a dependence of the rate on the activation force of a  
497 particular centre can be expected. We did not have the opportunity to measure activation from each  
498 centre directly, but indirect data were provided by the rate of increase in light scattering intensity and  
499 the lag-time of spontaneous clots appearance. For ErMPs, there was no correlation between VI max  
500 and Vsc:  $r=0.19$ ,  $p=0.22$ . For MPs of other types, the correlation of these parameters was significant  
501 but weak: 0.43 ( $p=0.026$ ) for PMPs, 0.58 ( $p=8 \cdot 10^{-9}$ ) for EMPs, and 0.32 ( $p=0.004$ ) for MMPs (Fig.  
502 12). The  $t$  lag did not show a strong correlation with Vsc also: -0.45 ( $p=0.03$ ) for PMPs, -0.64  
503 ( $p=1.2 \cdot 10^{-4}$ ) for ErMPs, -0.35 ( $p=0.025$ ) for EMPs, and -0.5 ( $p=0.0015$ ) for MMPs (Fig. 13). Thus, the  
504 deviations in Vsc within one test were determined at least not only by the activation strength.

505

506 **Fig. 12.** The rate of coagulation front propagation from centres of spontaneous clots and the  
507 maximal light scattering intensity in the centre of spontaneous clots growth rate correlation. (A) Data  
508 are represented for platelet MPs, (B) erythrocyte MPs, (C) endothelial MPs, and (D) monocyte MPs.

509

510 **Fig. 13.** The rate of coagulation front propagation from centres of spontaneous clots and the  
511 lag time of clots appearance. (A) Data are represented for platelet MPs, (B) erythrocyte MPs, (C)  
512 endothelial MPs, and (D) monocyte MPs.

513

514 *MPs of different origins in coagulation propagation*

515

516 The influence of MPs on coagulation propagation was evaluated by changes in the initial ( $V_i$ )  
517 and stationary ( $V_s$ ) growth rates of clot growing from the activator in the Thrombodynamics test at  
518 different MPs concentrations (Fig. 14). Clot growth rates were calculated for MPs concentrations from  
519 0 to those at which spontaneous clots were formed within 30 min, which prevented the correct  
520 calculation of the rates.  $V_i$  dependences on the concentrations of MPs of different origins tended to

521 saturate with increasing concentration (Fig. 14 A, C). Vs dependences had the same tendency, but the  
522 influence of MPs was weaker and the saturation was less pronounced (Fig. 14 B, D). MMPs bearing  
523 the highest TF concentrations caused active spontaneous clotting at concentrations of  $4\text{-}16 \cdot 10^3/\mu\text{l}$ ,  
524 which did not allow the measurement of clot growth rate dependences on concentration in the same  
525 range as for other MPs types. At a concentration of  $3 \cdot 10^3/\mu\text{l}$ , MMPs increased  $V_i$  by  $5 \pm 6 \mu\text{m}/\text{min}$  and  
526  $V_s$  by  $2.4 \pm 2.2 \mu\text{m}/\text{min}$ . For THP MPs and EMPs bearing lower TF concentrations, the rate  
527 dependences on concentration could be measured to  $50 \cdot 10^3/\mu\text{l}$  and  $200 \cdot 10^3/\mu\text{l}$ , respectively.  
528 Significant differences in the rate dependences on the MPs concentrations of different origins were not  
529 observed in this range (Fig. 14 A, B). However, the  $V_i$  and  $V_s$  dependence on the ErMPs concentration  
530 tended to be smoother than the dependence on the MPs of other types at these concentrations. The  
531 measurement of rate dependences at higher concentrations was possible for PMPs and ErMPs only.  
532 The saturation levels of  $V_i$  were considerably different for these MPs types. The difference in  $V_s$  at  
533 high PMPs and ErMPs concentrations was even more pronounced (Fig. 14 A, C).

534

535 **Fig. 14.** Influence of MPs of different origin on coagulation propagation. Mean  $\pm$  sd dependence of  
536 the initial (A) and stationary (B) clot growth rates on platelet (PMPs) (n=10), erythrocyte (ErMPs)  
537 (n=7), endothelial (EMPs) (n=5), THP monocyte culture (THP MPs) (n=6) and monocyte (MMPs)  
538 (n=5) microparticles concentrations. (C), (D) The same dependences on a smaller scale.

539

540 It is possible that the difference between ErMPs and PMPs is explained by the different contents  
541 of phosphatidylserine (PS) because platelet membranes contain, according to various sources, from  
542 6.7 to 12% PS [41–44], while erythrocyte membranes range from 13 to 16% [41,42,45]. To examine  
543 the effect of the PS content, we measured the dependence of clot growth rates on the concentration of  
544 artificial vesicles with a diameter of 100 nm, consisting of phosphatidylcholine (PC) and PS. The PS  
545 contents were 10%, 15%, and 20%. Based on the area occupied by one phospholipid molecule and the

546 surface area of the vesicle, a concentration of 1  $\mu\text{M}$  phospholipids corresponds to approximately  
547  $1.4 \cdot 10^7/\mu\text{l}$  of vesicles, which is approximately 20 times higher than the concentration of ErMPs causing  
548 spontaneous coagulation. Artificial vesicles did not induce spontaneous clotting at any of the tested  
549 concentrations. Both  $V_i$  and  $V_s$  reached saturation for artificial vesicles. The PS content increment  
550 from 10% to 20% led to a sharp increase in the slope of the initial linear part of the  $V_s$  dependence on  
551 the vesicle concentration from  $0.24 \mu\text{m}/(\text{min} \cdot \mu\text{M})$  to  $5.1 \mu\text{m}/(\text{min} \cdot \mu\text{M})$ . Moreover, with an increase in  
552 PS content, the concentration at which the rates reached saturation decreased, but the saturation level  
553 did not change (Fig. 15). The maximal increase in  $V_s$  due to artificial vesicles was  $13 \pm 3 \mu\text{m}/\text{min}$ .  
554 PMPs and ErMPs demonstrated a large deviation between donors. PMPs increased  $V_s$  by  $11 \pm 4 \mu\text{m}/\text{min}$   
555 on average and ErMPs by  $23 \pm 8 \mu\text{m}/\text{min}$  at a concentration of  $500 \cdot 10^3/\mu\text{l}$ . At a concentration of  
556  $1000 \cdot 10^3/\mu\text{l}$ , ErMPs increased  $V_s$  by  $30 \pm 10 \mu\text{m}/\text{min}$ , and no saturation was observed. Therefore, both  
557 the type of dependence and the maximal effect indicate that the influence of ErMPs on  $V_s$  was not  
558 explained solely by the content of PS.

559

560 **Fig. 15.** Influence of artificial vesicles on coagulation propagation. Mean  $\pm$  sd dependence of  
561 the initial (A) and stationary (B) clot growth rates on the concentration of artificial phospholipid  
562 vesicles (PL) containing 10% (n=3), 15% (n=3) and 20% (n=2) PS.

563

## 564 Discussion

565 It was previously shown that MPs in the plasma of patients cause the formation of spontaneous  
566 clots [46]. In the vast majority of cases, the clot growth rate from the activator in these samples was  
567 also increased. In this work, we investigated MPs of which origin has the strongest effect on the  
568 formation of spontaneous clots and the clot growth rate from the activator and, therefore, on  
569 coagulation activation and propagation. For this purpose, we tested MPs obtained in vitro from the  
570 main possible sources of MPs in blood in the Thrombodynamics test.



571 Our method of MPs counting with flow cytometry had some differences with the standard one:  
572 instead of counting annexin-positive MPs only, we took into account all the objects less than 1  $\mu\text{m}$  and  
573 higher than the fluorescence threshold (the number of objects in stained buffer was subtracted). This  
574 was done because the percentage of annexin V-positive MPs (above the threshold of the negative  
575 control) significantly varied in MPs of different cellular origins: lower than 10%, 15-20%,  
576 approximately 30%, and up to 40% for ErMPs, PMPs, MMPs and THP MPs, and EMPs, respectively  
577 (see Materials and Methods). Variations in the percentage of annexin V-positive MPs could be at least  
578 partially explained by the difference in MPs size. Earlier, using the dynamic light scattering method,  
579 for the MPs sizing, we have shown in direct comparative studies that ErMPs have an average diameter  
580 of 200-250 nm, PMPs 350-400 nm, EMPs and THP MPs 400-500 nm, and EMPs 550-600 nm  
581 [29,30,47]. We presumed that annexin V-FITC binding to small MPs was too low to provide FITC  
582 signals above the threshold noise level, which is why we measured the different percentages of annexin  
583 V-positive events in samples of MPs of different origins with different average sizes.

584 It is difficult to evaluate the physiological range of MPs concentrations by comparing the  
585 absolute values of concentrations with literature data, since even when measuring concentrations using  
586 flow cytometry, depending on the measurement protocol and the cytometer used, normal MPs  
587 concentrations may vary from hundreds to  $10^6/\mu\text{l}$  [2,48–51]. Therefore, the physiological range of  
588 concentrations could be estimated only in relation to the normal MPs concentration measured in the  
589 same study. Our method of MPs counting is not applicable for measuring MPs concentrations in  
590 plasma. As a result, we can only assess the physiological range of concentrations indirectly. According  
591 to our data, the concentration of PS + MPs in the plasma is  $53 \cdot 10^3/\mu\text{l}$ . The same concentration of PS +  
592 MPs is contained in approximately  $300 \cdot 10^3/\mu\text{l}$  PMPs,  $530 \cdot 10^3/\mu\text{l}$  ErMPs,  $180 \cdot 10^3/\mu\text{l}$  MMPs and  
593  $130 \cdot 10^3/\mu\text{l}$  EMPs. Since ErMPs, EMPs, and MMPs normally make up less than 20% of the total MPs  
594 concentration [2], a concentration of  $500 \cdot 10^3/\mu\text{l}$  for ErMPs and  $200 \cdot 10^3/\mu\text{l}$  for EMPs and MMPs can  
595 serve as a rough estimate of the upper physiologically achievable concentrations.

596 The MPs activity in coagulation activation, estimated from the minimal concentration causing  
597 spontaneous clotting, was determined primarily by TF on the surface of the MPs, which corresponds  
598 to the results from comparing the same MPs in the recalcification test in our previous works [29–31]  
599 and in the thrombin generation test in [24–26]. Based on the fact that MMPs, such as THP MPs, have  
600 ~ 30% PS+MPs, the ratio of PS+MMPs leading to spontaneous clotting to the normal concentration  
601 of PS + MPs in plasma will be approximately 4%. Such a concentration seems quite achievable in  
602 vivo, especially locally, for example, for inflammatory vascular diseases, monocytes and endothelium  
603 activation.

604 The ratio of the number of coagulation centres to the number of MPs in a chamber is on the order of  
605 one clot per  $10^3$ - $10^7$  MPs. This led to the assumption that coagulation centres may be caused not by  
606 MPs themselves but by some larger residual fragments of cells or MPs aggregates. In addition to the  
607 fact that the ratio of the number of clots to the number of MPs is greater for TF-bearing MMPs and  
608 EMPs, coagulation begins over the whole volume of the chamber, not just from the individual centres,  
609 when certain concentrations of MMPs and EMPs are reached. This is probably due to the participation  
610 of a much larger fraction of TF+MPs than  $1/10^3$  in coagulation activation due to the effect described  
611 by Kastrup et al., when the convergence of several centres with individual subthreshold activation  
612 leads to overcoming the activation threshold [52].

613 In the range up to  $200 \cdot 10^3/\mu\text{l}$ , there were no significant differences in the effect of PMPs,  
614 ErMPs, and EMPs on the clot growth rate. Perhaps we could not identify it due to deviations between  
615 the MPs samples isolated from the cells of different donors and between the donor plasmas in which  
616 the titrations were performed. However, in view of the fact that the differences in the effects of MPs  
617 on the rates were weak and the protein composition in MPs originating from different cells is also  
618 different, the effect of MPs on rates is probably determined by the lipid composition of membranes to  
619 a larger extent than by the protein composition. Rather inactive at low concentrations, ErMPs at  
620  $500 \cdot 10^3/\mu\text{l}$  increased the clot growth rate to a significantly higher level in comparison with  $500 \cdot 10^3/\mu\text{l}$

621 PMPs. The growth rate of spontaneous clots induced by ErMPs also significantly exceeds the growth  
622 rate of clots induced by PMPs, EMPs and MMPs. The high ErMPs activity in coagulation propagation  
623 is consistent with the data of van der Meijden, where the same conditional PS activity, which was  
624 measured by the prothrombinase activity on MPs samples, corresponded to a 3-fold higher activity of  
625 PMPs compared with that of ErMPs [26]. ErMPs activity is not explained by PS only because artificial  
626 vesicles lead to clot growth rates that are significantly lower than those of ErMPs at concentrations  
627 higher than  $500 \cdot 10^3/\mu\text{l}$ , and an increase in the PS content in artificial vesicles did not change the  
628 saturation level. Other components of phospholipid composition may determine ErMPs activity.  
629 Notably, ErMP concentrations could be underestimated due to their small size. Thus, the difference  
630 between ErMPs and PMPs can partially be accounted for by higher ErMPs concentrations, and the  
631 attainability of  $500 \cdot 10^3/\mu\text{l}$  ErMPs in physiological conditions is questionable.

632 A significant distinction of TF-bearing MPs is that there are concentrations at which MPs are  
633 able to induce some separate clots, but the growth of these clots stops in the first 10-15 min of a test.  
634 Previously, Oliver et al. concluded, by means of the thrombin generation test, that TF-bearing MPs  
635 participate in coagulation activation but not in coagulation propagation [53]. It is likely that clot growth  
636 stops when subthreshold activation leads to thrombin impulses that are rapidly inhibited by plasma  
637 inhibitors, and the lipid surface may not be enough to support coagulation propagation because these  
638 concentrations are quite low. Another reason for the growth termination of EMPs and MMPs induced  
639 clots could be thrombomodulin on the surfaces of endothelium and monocytes [54,55].

640 Summarizing the results, we can say that MPs derived from different cells play a qualitatively  
641 different role in coagulation activation and propagation: TF+ MMPs have a strong activating ability  
642 and have a very weak effect on coagulation propagation; on the contrary, contact activation from PMPs  
643 and ErMPs in normal plasma is weak, and these MPs, firstly, contribute coagulation propagation.  
644 Although an increased concentration of MPs is usually regarded as a risk of thrombosis, MPs that have  
645 weak activating capacity but support coagulation propagation in some cases can play a positive role,

646 for example, by reducing blood loss during surgery or mitigating the clinical manifestations of  
647 haemophilia [56]. Endothelial MPs, although they have an intermediate activity, are able to make a  
648 significant contribution to both the activation and distribution of coagulation.

649

## 650 **Acknowledgments**

651 We thank Dr. Pantelev MA (Center for Theoretical Problems of Physicochemical  
652 Pharmacology, Moscow, Russia) for valuable discussions.

653

654 The study was supported by the Ministry of Science and Higher Education of the Russian  
655 Federation (project AAAA-A18-118012390250-0) and by the Russian Foundation for Basic Research  
656 together with National Center for Scientific Research of France (grant 19-51-15004 to Ataullakhanov  
657 F.I.).

658

## 659 **References**

- 660 1. Flaumenhaft R, Dilks JR, Richardson J, Alden E, Patel-Hett SR, Battinelli E, et al.  
661 Megakaryocyte-derived microparticles: direct visualization and distinction from platelet-  
662 derived microparticles. *Blood*. 2009;113: 1112–1121. doi:10.1182/blood-2008-06-163832
- 663 2. Berckmans RJ, Nieuwland R, Boing AN, Romijn FP, Hack CE, Sturk A. Cell-derived  
664 microparticles circulate in healthy humans and support low grade thrombin generation.  
665 *Thromb Haemost*. 2001;85: 639–646.
- 666 3. Owens AP, Mackman N. Microparticles in Hemostasis and Thrombosis. Weber C, Mause S,  
667 editors. *Circ Res*. 2011;108: 1284–1297. doi:10.1161/CIRCRESAHA.110.233056
- 668 4. George FD. Microparticles in vascular diseases. *Thromb Res*. 2008;122: S55–S59.  
669 doi:10.1016/S0049-3848(08)70020-3
- 670 5. Mooberry MJ, Key NS. Microparticle analysis in disorders of hemostasis and thrombosis.

- 671 Cytometry A. 2016;89: 111–22. doi:10.1002/cyto.a.22647
- 672 6. Vanwijk MJ, Vanbavel E, Sturk A, Nieuwland R. Microparticles in cardiovascular diseases.  
673 Cardiovasc Res. 2003;59: 277–287.
- 674 7. Nomura S, Shimizu M. Clinical significance of procoagulant microparticles. J Intensive Care.  
675 2015;3: 2. doi:10.1186/s40560-014-0066-z
- 676 8. Herring JM, McMichael MA, Smith SA. Microparticles in Health and Disease. J Vet Intern  
677 Med. 2013;27: 1020–1033. doi:10.1111/jvim.12128
- 678 9. Sun C, Zhao W-B, Chen Y, Hu H-Y. Higher Plasma Concentrations of Platelet Microparticles  
679 in Patients With Acute Coronary Syndrome: A Systematic Review and Meta-analysis. Can J  
680 Cardiol. 2016;32: 1325.e1-1325.e10. doi:10.1016/j.cjca.2016.02.052
- 681 10. Cui Y, Zheng L, Jiang M, Jia R, Zhang X, Quan Q, et al. Circulating microparticles in patients  
682 with coronary heart disease and its correlation with interleukin-6 and C-reactive protein. Mol  
683 Biol Rep. 2013;40: 6437–6442. doi:10.1007/s11033-013-2758-1
- 684 11. Mallat Z, Benamer H, Hugel B, Benessiano J, Steg PG, Freyssinet JM, et al. Elevated levels of  
685 shed membrane microparticles with procoagulant potential in the peripheral circulating blood  
686 of patients with acute coronary syndromes. Circulation. 2000;101: 841–843. Available:  
687 <http://www.ncbi.nlm.nih.gov/pubmed/10694520>
- 688 12. Bernal-Mizrachi L, Jy W, Jimenez JJ, Pastor J, Mauro LM, Horstman LL, et al. High levels of  
689 circulating endothelial microparticles in patients with acute coronary syndromes. Am Heart J.  
690 2003;145: 962–970. doi:10.1016/S0002-8703(03)00103-0
- 691 13. Zwicker JJ, Liebman HA, Neuberg D, Lacroix R, Bauer KA, Furie BC, et al. Tumor-derived  
692 tissue factor-bearing microparticles are associated with venous thromboembolic events in  
693 malignancy. Clin Cancer Res. 2009;15: 6830–6840. doi:10.1158/1078-0432.CCR-09-0371
- 694 14. Campello E, Spiezia L, Radu CM, Bulato C, Castelli M, Gavasso S, et al. Endothelial, platelet,  
695 and tissue factor-bearing microparticles in cancer patients with and without venous

- 696 thromboembolism. *Thromb Res.* 2011;127: 473–477. doi:10.1016/j.thromres.2011.01.002
- 697 15. Tesselaar MET, Romijn FPHTM, Van Der Linden IK, Bertina RM, Osanto S. Microparticle-  
698 associated tissue factor activity in cancer patients with and without thrombosis. *J Thromb*  
699 *Haemost.* 2009;7: 1421–1423. doi:10.1111/j.1538-7836.2009.03504.x
- 700 16. Manly DA, Wang J, Glover SL, Kasthuri R, Liebman HA, Key NS, et al. Increased  
701 microparticle tissue factor activity in cancer patients with Venous Thromboembolism. *Thromb*  
702 *Res.* 2010;125: 511–2. doi:10.1016/j.thromres.2009.09.019
- 703 17. Campello E, Spiezia L, Radu CM, Simioni P. Microparticles as biomarkers of venous  
704 thromboembolic events. *Biomark Med.* 2016;10: 743–755. doi:10.2217/bmm-2015-0063
- 705 18. Nozaki T, Sugiyama S, Sugamura K, Ohba K, Matsuzawa Y, Konishi M, et al. Prognostic  
706 value of endothelial microparticles in patients with heart failure. *Eur J Heart Fail.* 2010;12:  
707 1223–1228. doi:10.1093/eurjhf/hfq145
- 708 19. Amabile N, Guerin AP, Tedgui A, Boulanger CM, London GM. Predictive value of  
709 circulating endothelial microparticles for cardiovascular mortality in end-stage renal failure: a  
710 pilot study. *Nephrol Dial Transplant.* 2012;27: 1873–1880. doi:10.1093/ndt/gfr573
- 711 20. Koga H, Sugiyama S, Kugiyama K, Watanabe K, Fukushima H, Tanaka T, et al. Elevated  
712 Levels of VE-Cadherin-Positive Endothelial Microparticles in Patients With Type 2 Diabetes  
713 Mellitus and Coronary Artery Disease. *J Am Coll Cardiol.* 2005;45: 1622–1630.  
714 doi:10.1016/J.JACC.2005.02.047
- 715 21. Sinauridze EI, Kireev DA, Popenko NY, Pichugin A V, Panteleev MA, Krymskaya O V, et al.  
716 Platelet microparticle membranes have 50- to 100-fold higher specific procoagulant activity  
717 than activated platelets. *Thromb Haemost.* 2007;97: 425–434. Available:  
718 <http://www.ncbi.nlm.nih.gov/pubmed/17334510>
- 719 22. Gilbert GE, Sims PJ, Wiedmer T, Furie B, Furie BC, Shattil SJ. Platelet-derived  
720 microparticles express high affinity receptors for factor VIII. *J Biol Chem.* 1991;266: 17261–

- 721 17268.
- 722 23. Sims PJ, Faioni EM, Wiedmer T, Shattil SJ. Complement proteins C5b-9 cause release of  
723 membrane vesicles from the platelet surface that are enriched in the membrane receptor for  
724 coagulation factor Va and express prothrombinase activity. *J Biol Chem.* 1988;263: 18205–  
725 18212.
- 726 24. Aleman MM, Gardiner C, Harrison P, Wolberg AS. Differential contributions of monocyte-  
727 and platelet-derived microparticles towards thrombin generation and fibrin formation and  
728 stability. *J Thromb Haemost.* 2011;9: 2251–2261. doi:10.1111/j.1538-7836.2011.04488.x
- 729 25. Tripisciano C, Weiss R, Eichhorn T, Spittler A, Heuser T, Fischer MB, et al. Different  
730 Potential of Extracellular Vesicles to Support Thrombin Generation: Contributions of  
731 Phosphatidylserine, Tissue Factor, and Cellular Origin. *Sci Rep.* 2017;7: 6522.  
732 doi:10.1038/s41598-017-03262-2
- 733 26. van der Meijden PEJ, van Schilfgaarde M, van Oerle R, Renné T, ten Cate H, Spronk HMH.  
734 Platelet- and erythrocyte-derived microparticles trigger thrombin generation via factor XIIa. *J*  
735 *Thromb Haemost.* 2012;10: 1355–1362. doi:10.1111/j.1538-7836.2012.04758.x
- 736 27. Rubin O, Delobel J, Prudent M, Lion N, Kohl K, Tucker EI, et al. Red blood cell-derived  
737 microparticles isolated from blood units initiate and propagate thrombin generation.  
738 *Transfusion.* 2013;53: 1744–1754. doi:10.1111/trf.12008
- 739 28. Khaspekova SG, Antonova OA, Shustova ON, Yakushkin V V., Golubeva N V., Titaeva E V.,  
740 et al. Activity of tissue factor in microparticles produced in vitro by endothelial cells,  
741 monocytes, granulocytes, and platelets. *Biochem (Moscow).* 2016;81: 114–121.  
742 doi:10.1134/S000629791602005X
- 743 29. Shustova ON, Antonova OA, Golubeva N V., Khaspekova SG, Yakushkin V V., Aksuk SA, et  
744 al. Differential procoagulant activity of microparticles derived from monocytes, granulocytes,  
745 platelets and endothelial cells. *Blood Coagul Fibrinolysis.* 2017;28: 373–382.

- 746 doi:10.1097/MBC.0000000000000609
- 747 30. Antonova OA, Shustova ON, Yakushkin V V, Alchinova IB, Karganov MY, Mazurov A V.  
748 Coagulation properties of erythrocyte derived membrane microparticles. *Biochem (Moscow)*  
749 *Suppl Ser B Biomed Chem.* 2019;13: 237–243. doi:10.1134/S1990750819030028
- 750 31. Khaspekova SG, Antonova OA, Shustova ON, Yakushkin V V., Golubeva N V., Titaeva E V.,  
751 et al. Activity of tissue factor in microparticles produced in vitro by endothelial cells,  
752 monocytes, granulocytes, and platelets. *Biochem (Moscow).* 2016;81: 114–121.  
753 doi:10.1134/S000629791602005X
- 754 32. Van Der Meijden PE, Van Schilfgaarde M, Van Oerle R, Renne T, ten Cate H, Spronk HM.  
755 Platelet- and erythrocyte-derived microparticles trigger thrombin generation via factor XIIa. *J*  
756 *Thromb Haemost.* 2012/04/28. 2012;10: 1355–1362. doi:10.1111/j.1538-7836.2012.04758.x
- 757 33. Balandina AN, Serebriyskiy II, Poletaev A V, Polokhov DM, Gracheva MA, Koltsova EM, et  
758 al. Thrombodynamics-A new global hemostasis assay for heparin monitoring in patients under  
759 the anticoagulant treatment. *PLoS One.* 2018;13: e0199900.  
760 doi:10.1371/journal.pone.0199900
- 761 34. Dashkevich NM, Vuimo TA, Ovsepyan RA, Surov SS, Soshitova NP, Panteleev MA, et al.  
762 Effect of Pre-Analytical Conditions on the Thrombodynamics Assay. *Thromb Res.* 2014;133:  
763 472–476. doi:10.1016/J.THROMRES.2013.12.014
- 764 35. Sinauridze EI, Vuimo TA, Tarandovskiy ID, Ovsepyan RA, Surov SS, Korotina NG, et al.  
765 Thrombodynamics, a new global coagulation test: Measurement of heparin efficiency.  
766 *Talanta.* 2018;180: 282–291. doi:10.1016/j.talanta.2017.12.055
- 767 36. Arnljots B, Ezban M, Hedner U. Prevention of experimental arterial thrombosis by topical  
768 administration of active site-inactivated factor VIIa. *J Vasc Surg.* 1997;25: 341–6. Available:  
769 <http://www.ncbi.nlm.nih.gov/pubmed/9052569>
- 770 37. Weisel JW, Nagaswami C. Computer modeling of fibrin polymerization kinetics correlated



- 771 with electron microscope and turbidity observations: clot structure and assembly are  
772 kinetically controlled. *Biophys J.* 1992;63: 111–28. doi:10.1016/S0006-3495(92)81594-1
- 773 38. Dashkevich NM, Ovanesov M V, Balandina AN, Karamzin SS, Shestakov PI, Soshitova NP,  
774 et al. Thrombin activity propagates in space during blood coagulation as an excitation wave.  
775 *Biophys J.* 2012;103: 2233–40. doi:10.1016/j.bpj.2012.10.011
- 776 39. Ovanesov M V., Ananyeva NM, Pantelev MA, Ataulakhanov FI, Saenko EL. Initiation and  
777 propagation of coagulation from tissue factor-bearing cell monolayers to plasma: initiator cells  
778 do not regulate spatial growth rate. *J Thromb Haemost.* 2005;3: 321–331. doi:10.1111/j.1538-  
779 7836.2005.01128.x
- 780 40. Ovanesov M V, Krasotkina J V, Ul'yanova LI, Abushinova K V, Plyushch OP, Domogatskii  
781 SP, et al. Hemophilia A and B are associated with abnormal spatial dynamics of clot growth.  
782 *Biochim Biophys Acta - Gen Subj.* 2002;1572: 45–57. doi:10.1016/S0304-4165(02)00278-7
- 783 41. Owen JS, Hutton RA, Day RC, Bruckdorfer KR, McIntyre N. Platelet lipid composition and  
784 platelet aggregation in human liver disease. *J Lipid Res.* 1981;22: 423–30. Available:  
785 <http://www.ncbi.nlm.nih.gov/pubmed/7240967>
- 786 42. Dougherty RM, Galli C, Ferro-Luzzi A, Iacono JM. Lipid and phospholipid fatty acid  
787 composition of plasma, red blood cells, and platelets and how they are affected by dietary  
788 lipids: a study of normal subjects from Italy, Finland, and the USA. *Am J Clin Nutr.* 1987;45:  
789 443–455. doi:10.1093/ajcn/45.2.443
- 790 43. Hamid M, Kunicki T, Aster R. Lipid composition of freshly prepared and stored platelet  
791 concentrates. *Blood.* 1980;55: 124–130.
- 792 44. Douste-Blazy L, Chap H, Gautheron P. Platelet lipid composition. *Haemostasis.* 1973;2: 85–  
793 91. doi:10.1159/000214009
- 794 45. Cohen P, Derksen A. Comparison of Phospholipid and Fatty Acid Composition of Human  
795 Erythrocytes and Platelets. *Br J Haematol.* 1969;17: 359–371. doi:10.1111/j.1365-

- 796 2141.1969.tb01382.x
- 797 46. Lipets E, Vlasova O, Urnova E, Margolin O, Soloveva A, Ostapushchenko O, et al.  
798 Circulating contact-pathway-activating microparticles together with factors IXa and XIa  
799 induce spontaneous clotting in plasma of hematology and cardiologic patients. PLoS One.  
800 2014;9: e87692. doi:10.1371/journal.pone.0087692
- 801 47. Alchinova IB, Khaspekova SG, Golubeva N V, Shustova ON, Antonova OA, Karganov MY,  
802 et al. Comparison of the size of membrane microparticles of different cellular origin by  
803 dynamic light scattering. Dokl Biochem Biophys. 2016;470: 322–325.  
804 doi:10.1134/S1607672916050045
- 805 48. Marques FK, Campos FMF, Filho OAM, Carvalho AT, Dusse LMS, Gomes KB. Circulating  
806 microparticles in severe preeclampsia. Clin Chim Acta. 2012;414: 253–258.  
807 doi:10.1016/J.CCA.2012.09.023
- 808 49. Tripodi A, Branchi A, Chantarangkul V, Clerici M, Merati G, Artoni A, et al.  
809 Hypercoagulability in patients with type 2 diabetes mellitus detected by a thrombin generation  
810 assay. J Thromb Thrombolysis. 2011;31: 165–172. doi:10.1007/s11239-010-0506-0
- 811 50. Arraud N, Gounou C, Turpin D, Brisson AR. Fluorescence triggering: A general strategy for  
812 enumerating and phenotyping extracellular vesicles by flow cytometry. Cytom Part A.  
813 2016;89: 184–195. doi:10.1002/cyto.a.22669
- 814 51. Chandler WL, Yeung W, Tait JF. A new microparticle size calibration standard for use in  
815 measuring smaller microparticles using a new flow cytometer. J Thromb Haemost. 2011;9:  
816 1216–24. doi:10.1111/j.1538-7836.2011.04283.x
- 817 52. Kastrup CJ, Runyon MK, Shen F, Ismagilov RF. Modular chemical mechanism predicts  
818 spatiotemporal dynamics of initiation in the complex network of hemostasis. Proc Natl Acad  
819 Sci U S A. 2006;103: 15747–52. doi:10.1073/pnas.0605560103
- 820 53. Ollivier V, Wang J, Manly D, Machlus KR, Wolberg AS, Jandrot-Perrus M, et al. Detection of

- 821 endogenous tissue factor levels in plasma using the calibrated automated thrombogram assay.  
822 Thromb Res. 2010;125: 90–96. doi:10.1016/j.thromres.2009.03.003
- 823 54. Satta N, Freyssinet J-M, Toti F. The significance of human monocyte thrombomodulin during  
824 membrane vesiculation and after stimulation by lipopolysaccharide. Br J Haematol. 1997;96:  
825 534–542. doi:10.1046/j.1365-2141.1997.d01-2059.x
- 826 55. Lacroix R, Dubois C, Leroyer AS, Sabatier F, Dignat-George F. Revisited role of  
827 microparticles in arterial and venous thrombosis. J Thromb Haemost. 2013;11: 24–35.  
828 doi:10.1111/jth.12268
- 829 56. Horstman LL, McCauley RF, Jy W, Ahn YS. Tissue Factor-Negative Cell-Derived  
830 Microparticles Play a Distinctive Role in Hemostasis: A Viewpoint Review. Semin Thromb  
831 Hemost. 2019;45: 509–513. doi:10.1055/s-0039-1688570

832

833 **Supplementary materials**

834 S1 Movie. Video of clots growing from activator and spontaneous clots in MP-depleted  
835 plasma supplemented with MPs of different origins in different concentrations.

836 Fig. S1. Dependence of the time of the first 5 spontaneous clots appearances on time. Data are  
837 represented for (A) platelet MPs, (B) erythrocyte MPs, (C) endothelial MPs, and (D) monocyte MPs.  
838 Dots correspond to individual tests, the mean values of  $t_{N=5}$  at different concentrations are connected  
839 with lines, and symbols of different types and colours correspond to different MPs samples.

840 Fig. S2. Comparison of the maximal light scattering intensity in the centres of spontaneous  
841 clots and of clots growing from activator. The maximal light scattering intensity dependence on the  
842 concentration of (A) platelet MPs, (B) erythrocyte MPs, (C) endothelial MPs, and (D) monocyte MPs.  
843 The maximal light scattering intensity in the centres of spontaneous clots is denoted with opened  
844 symbols, and that of clots growing from activator is denoted with filled symbols.

845 Fig. S3. Concentration dependence of the maximal light scattering intensity in the centres of  
846 spontaneous clots. Data represent (A) platelet MPs, (B) erythrocyte MPs, (C) endothelial MPs, and  
847 (D) monocyte MPs. Dots correspond to individual tests, the mean values of VI at different  
848 concentrations are connected with lines, and symbols of different types and colours correspond to  
849 different MP samples.

850 Fig. S4. Concentration dependence of the rate of coagulation front propagation from centres of  
851 spontaneous clots. Data represent (A) platelet MPs, (B) erythrocyte MPs, (C) endothelial MPs, and  
852 (D) monocyte MPs. Dots correspond to individual tests, the mean values of VI at different  
853 concentrations are connected with lines, and symbols of different types and colours correspond to  
854 different MP samples.

bioRxiv preprint doi: <https://doi.org/10.1101/2020.01.06.895722>; this version posted January 6, 2020. The copyright holder for this preprint (which was not certified by peer review) is the author/funder, who has granted bioRxiv a license to display the preprint in perpetuity. It is made available under aCC-BY 4.0 International license.

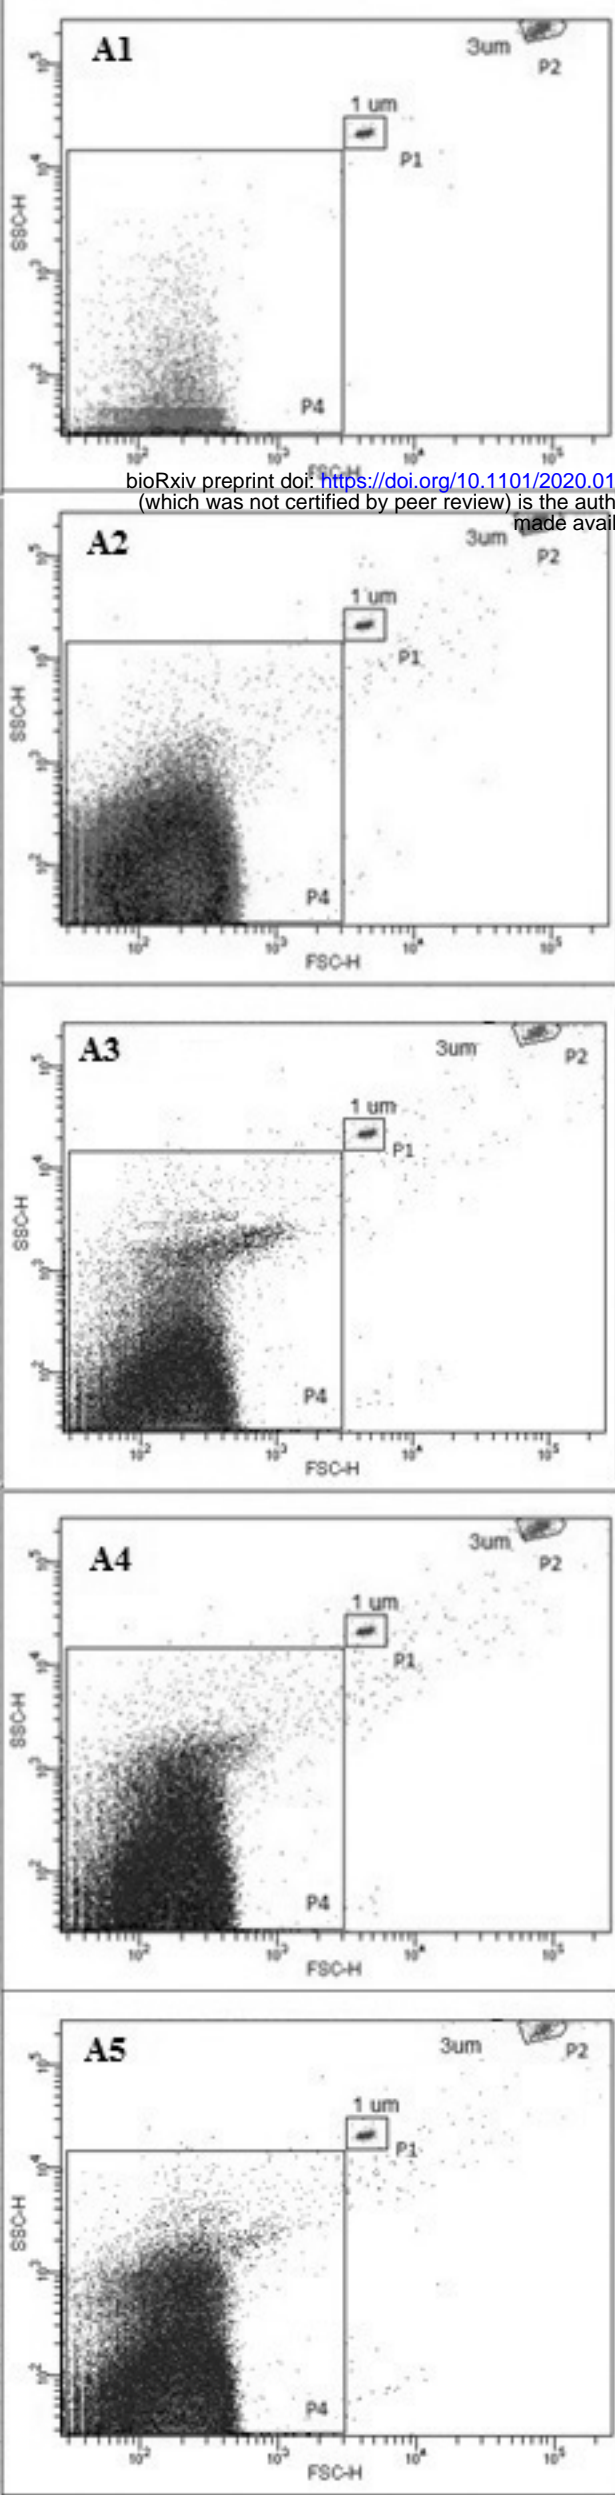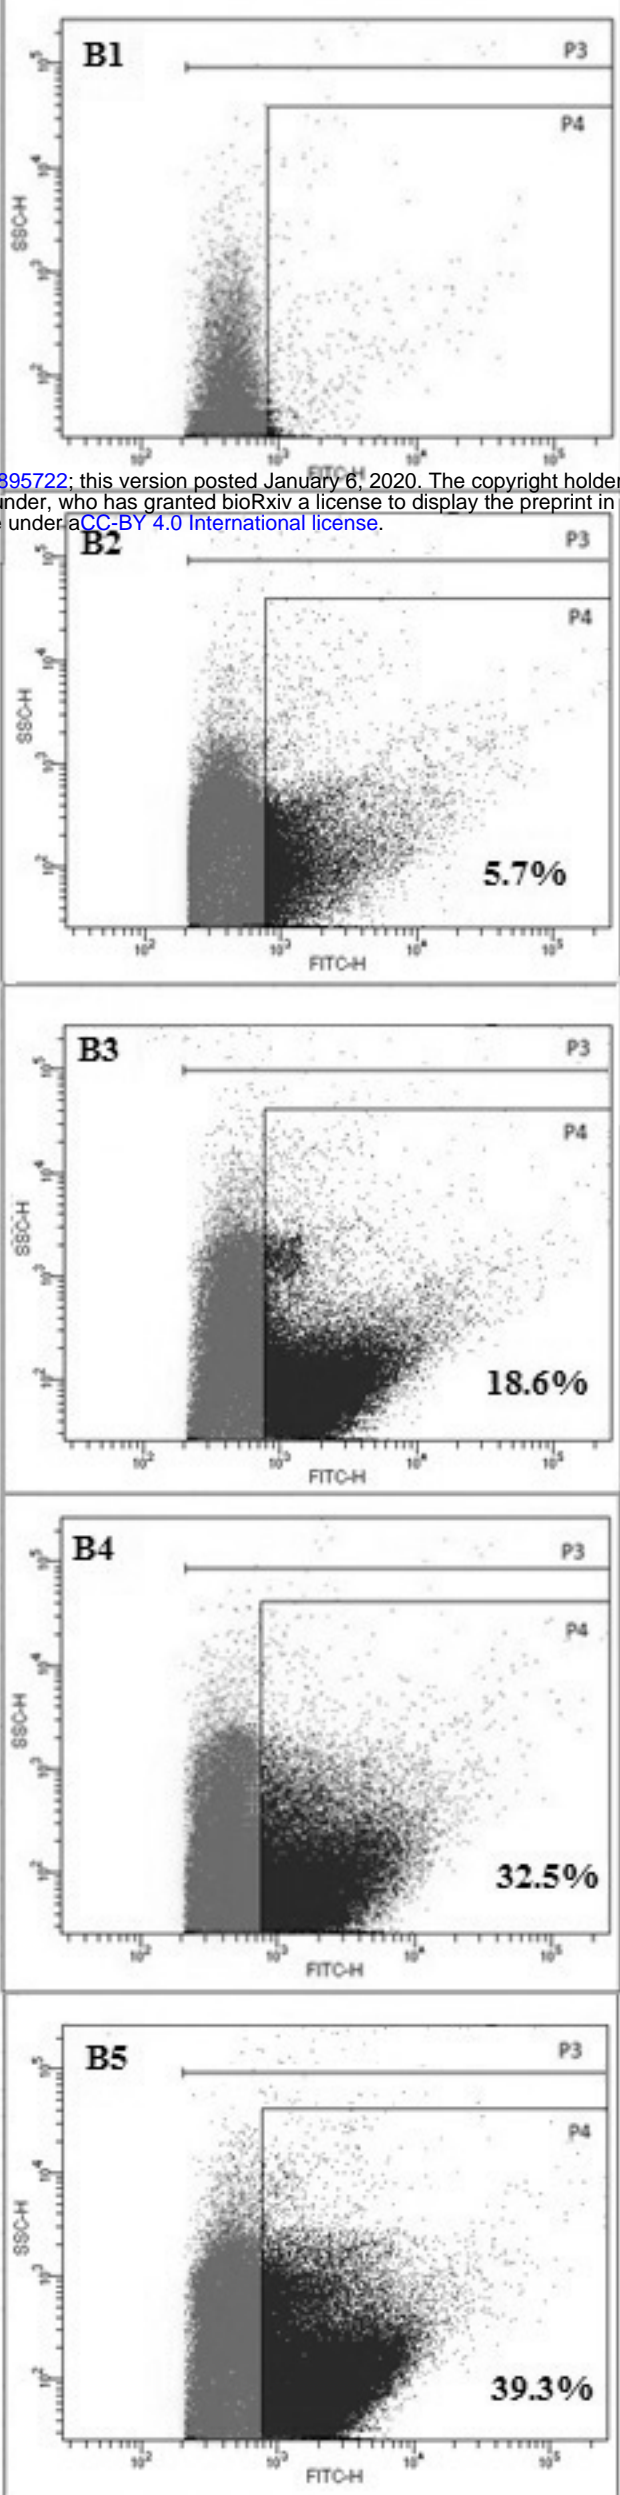

Figure

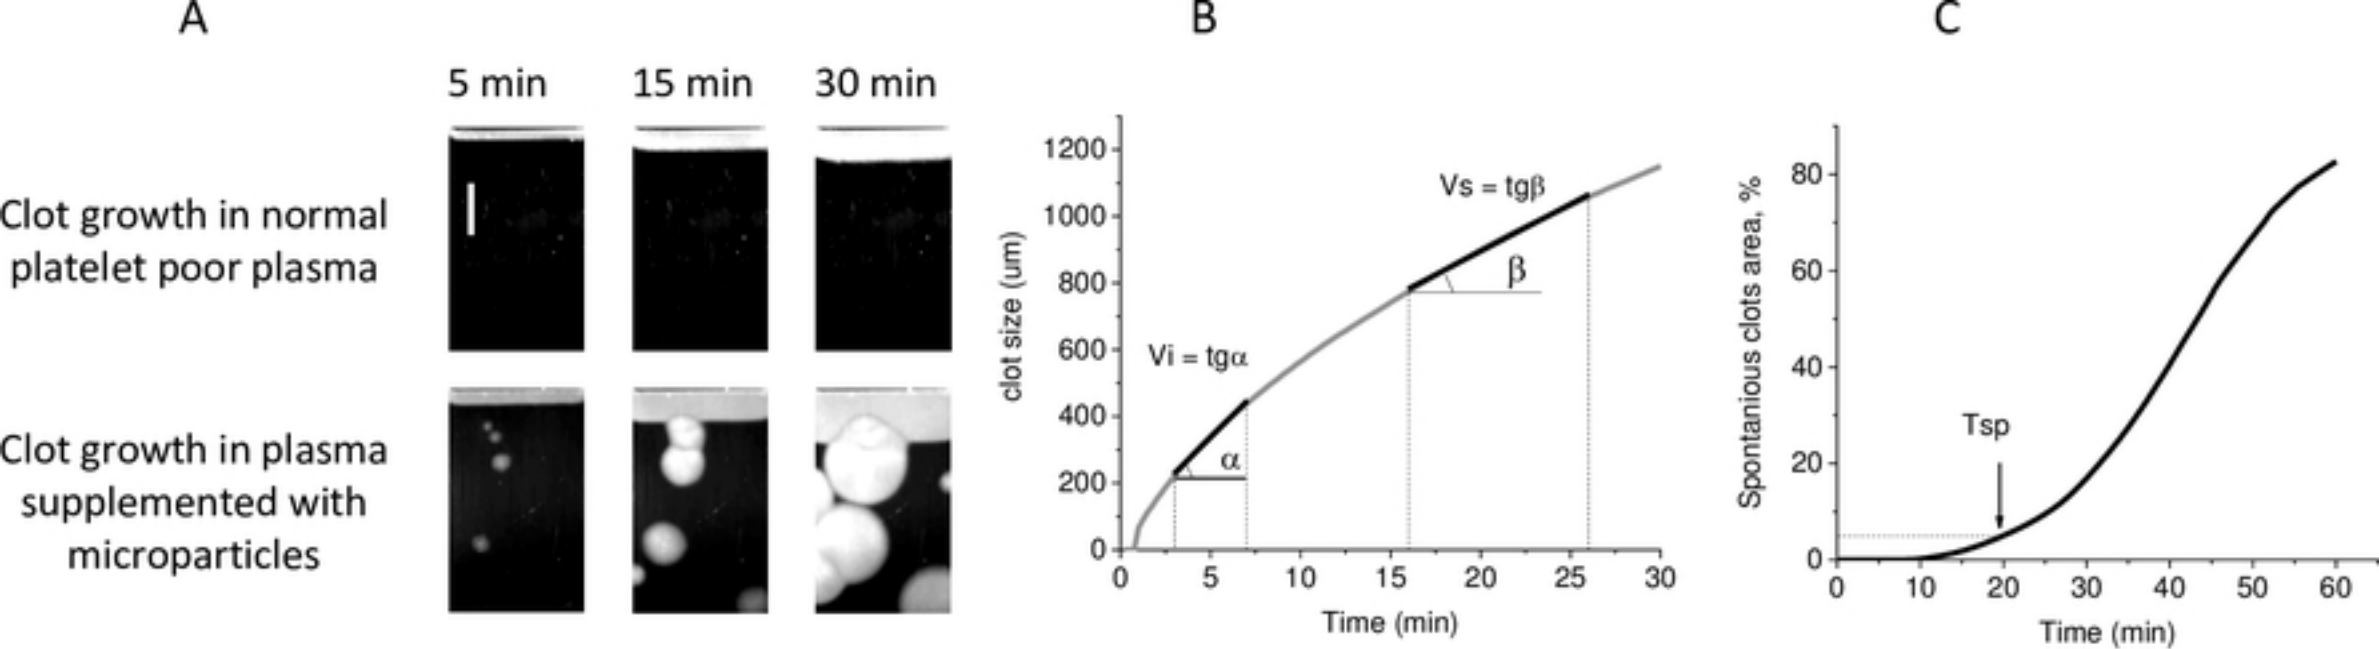

Figure

A

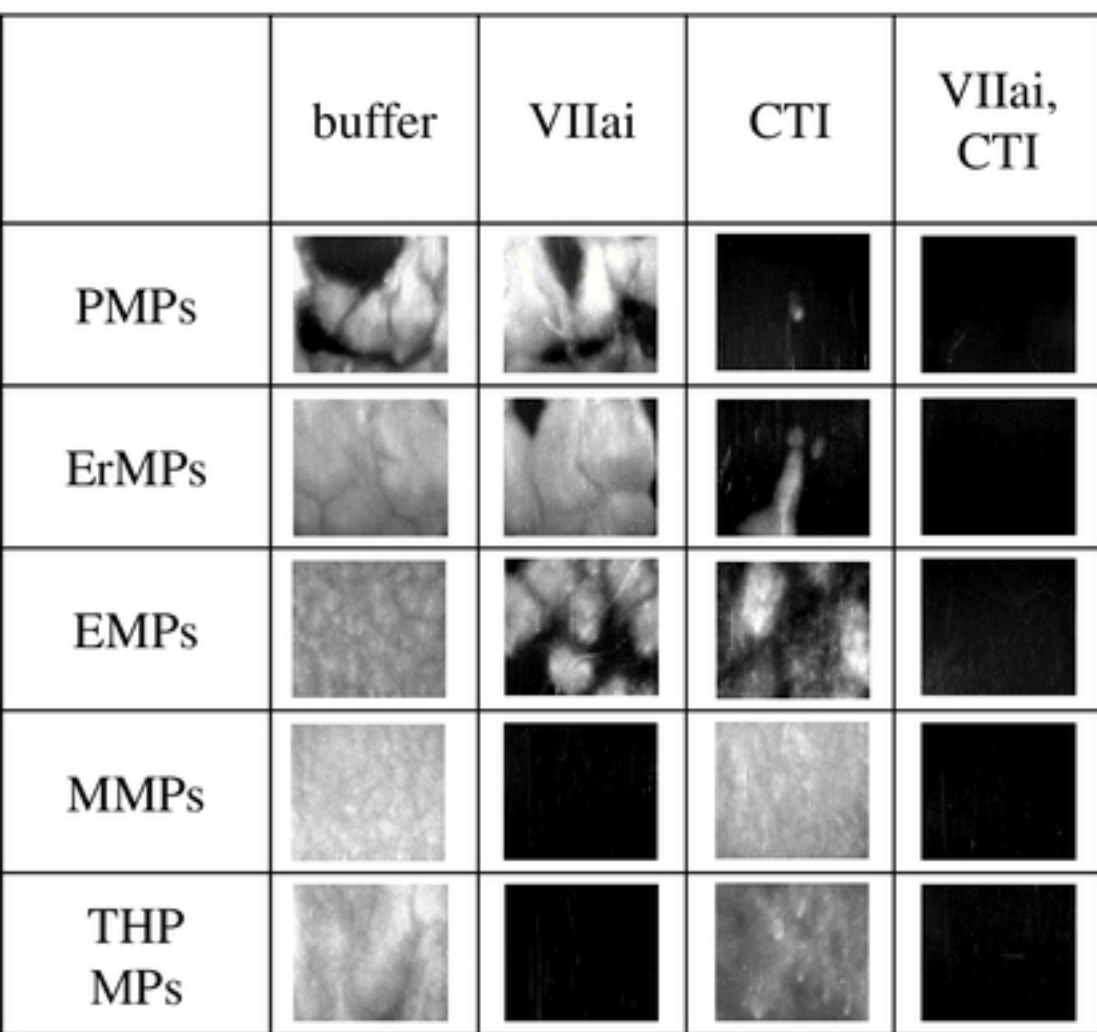

B

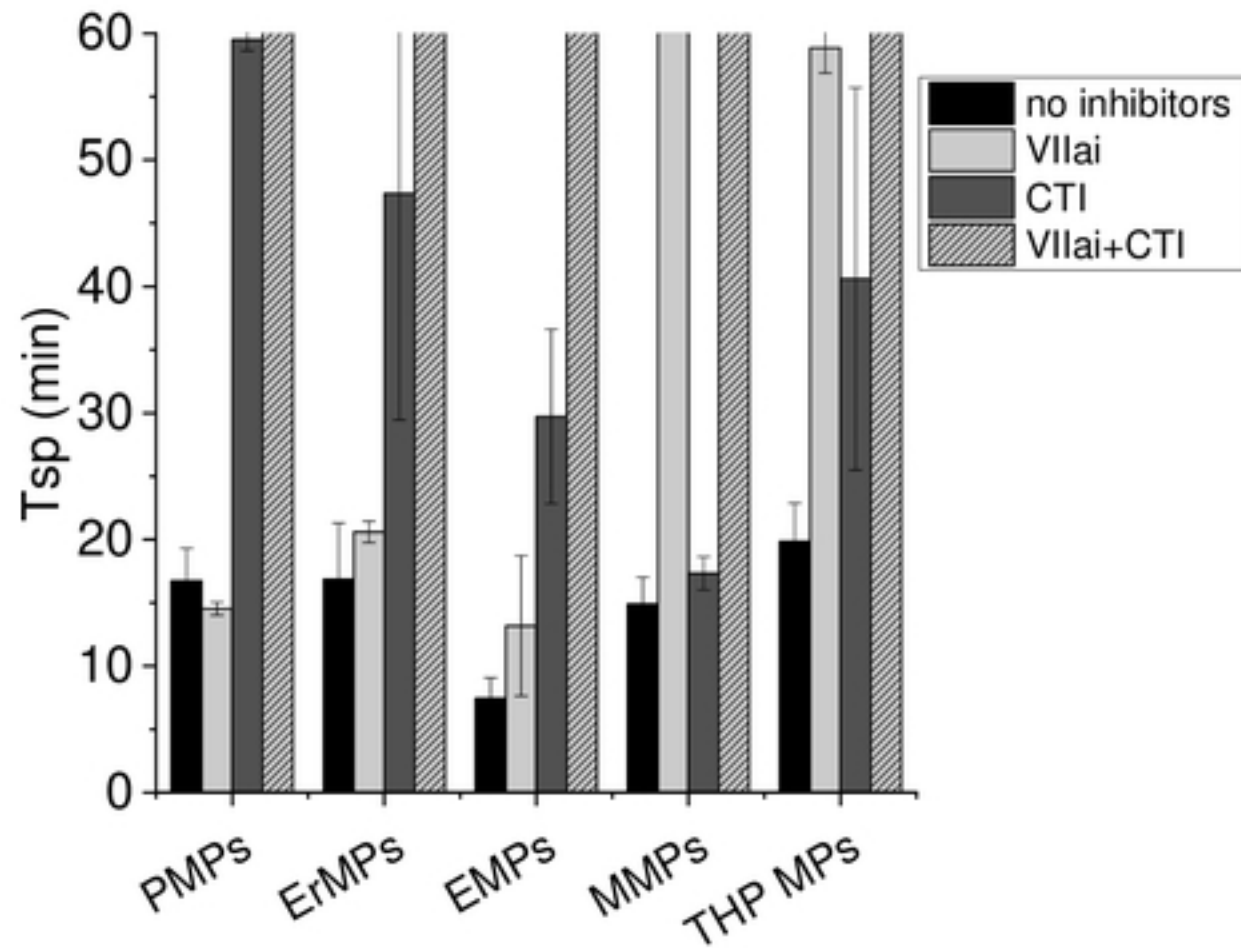

Figure

|                    | 5 min                                                                               | 15 min                                                                              | 30 min                                                                                | 45 min                                                                                | 60 min                                                                                |
|--------------------|-------------------------------------------------------------------------------------|-------------------------------------------------------------------------------------|---------------------------------------------------------------------------------------|---------------------------------------------------------------------------------------|---------------------------------------------------------------------------------------|
| MP depleted plasma |    |    |    |    |    |
| PMPs               |   |   |   |   |   |
| ErMPs              |  |  |  |  |  |
| EMPs               |  |  |  |  |  |
| MMPs               |  |  |  |  |  |
| THP MPs            |  |  |  |  |  |

Figure



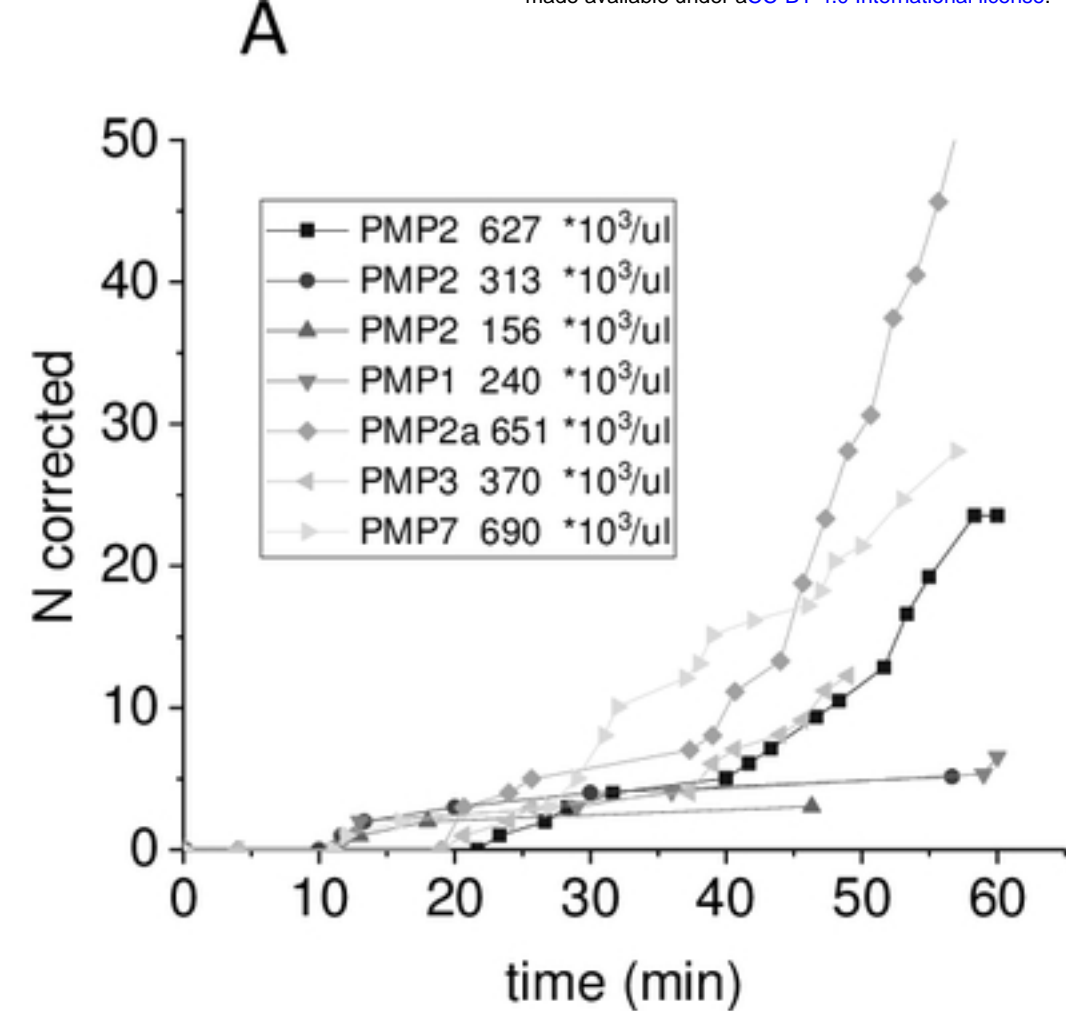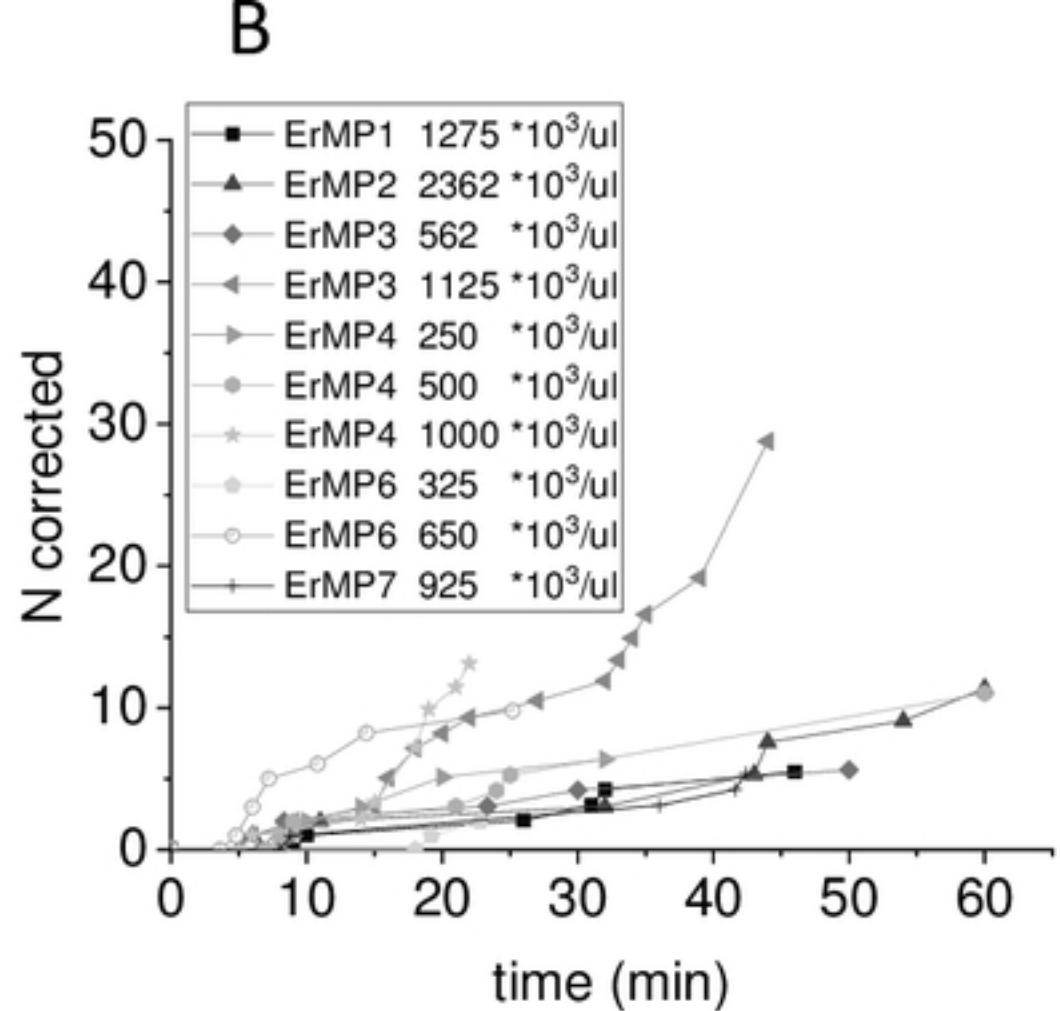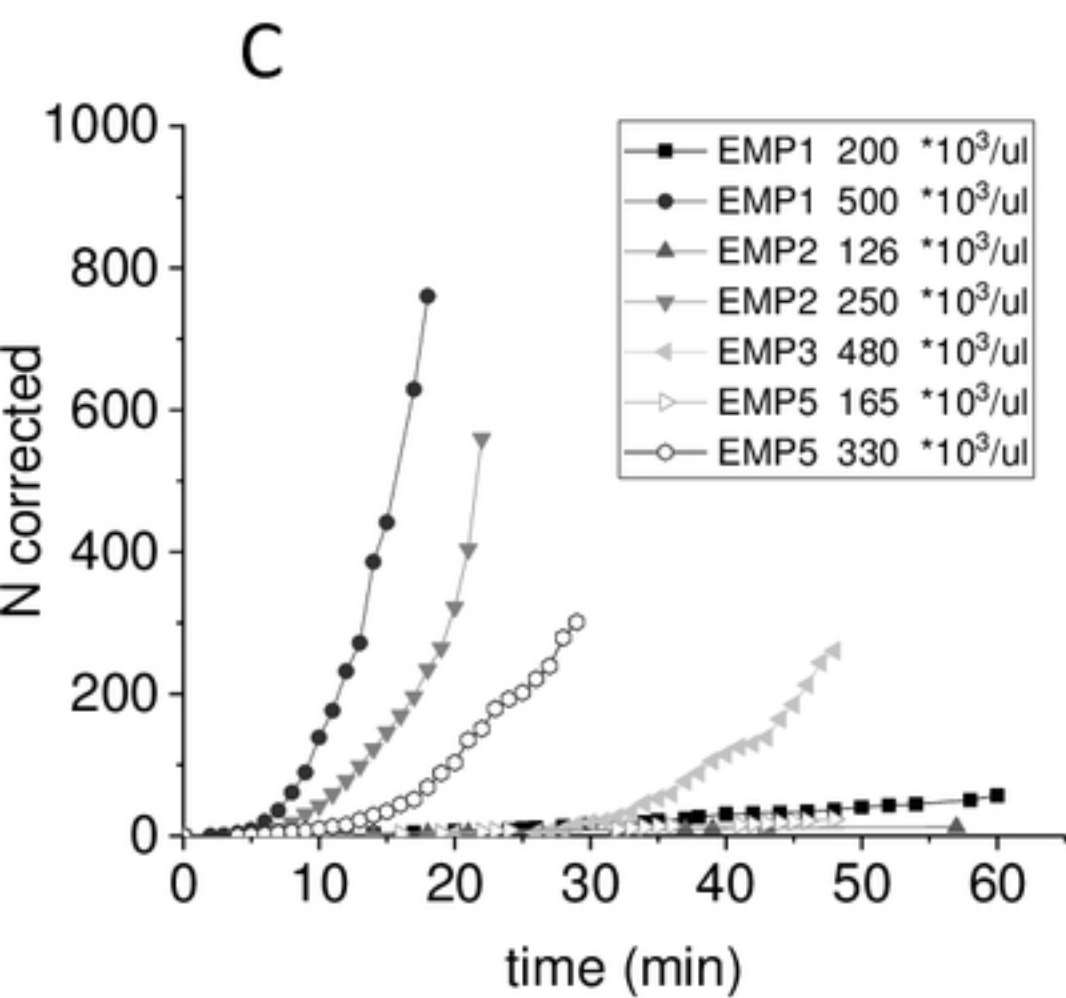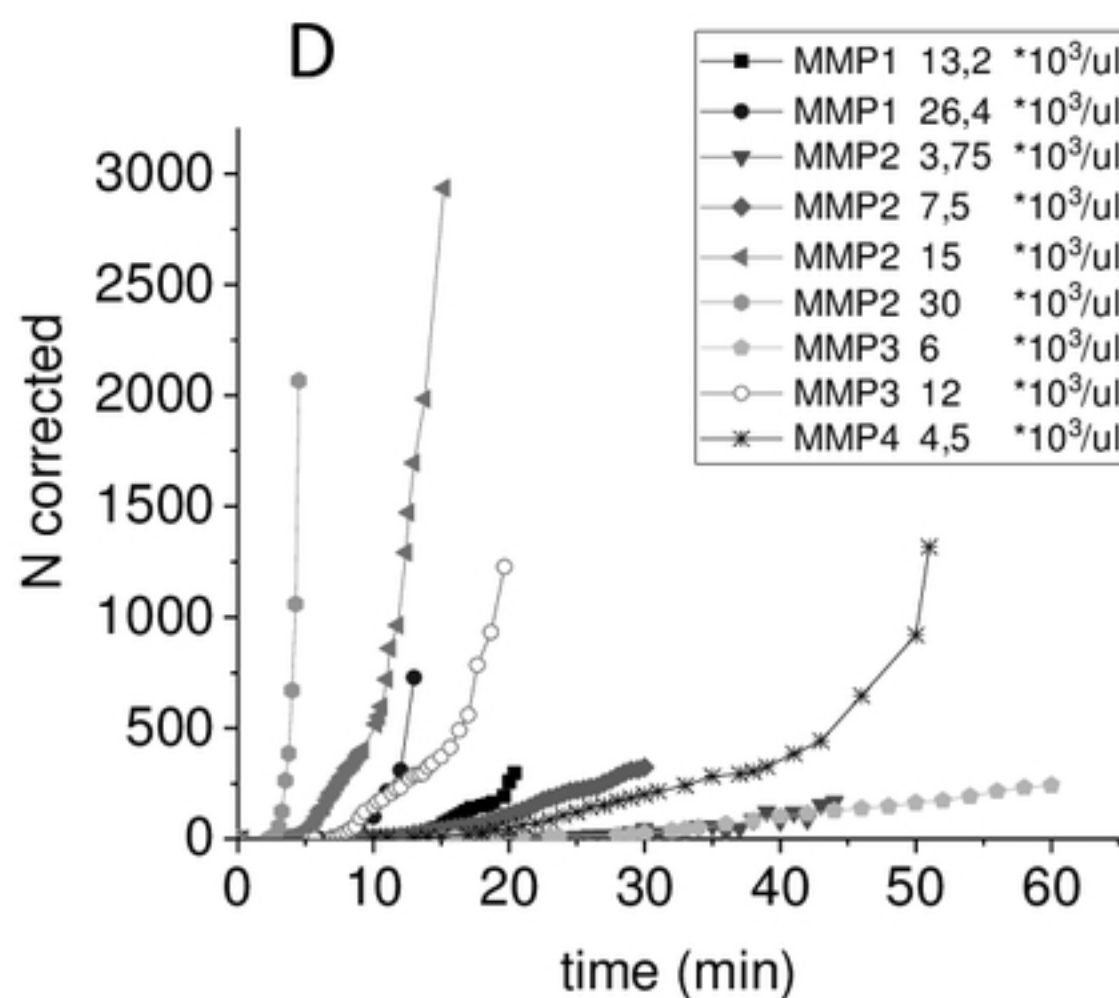

Figure

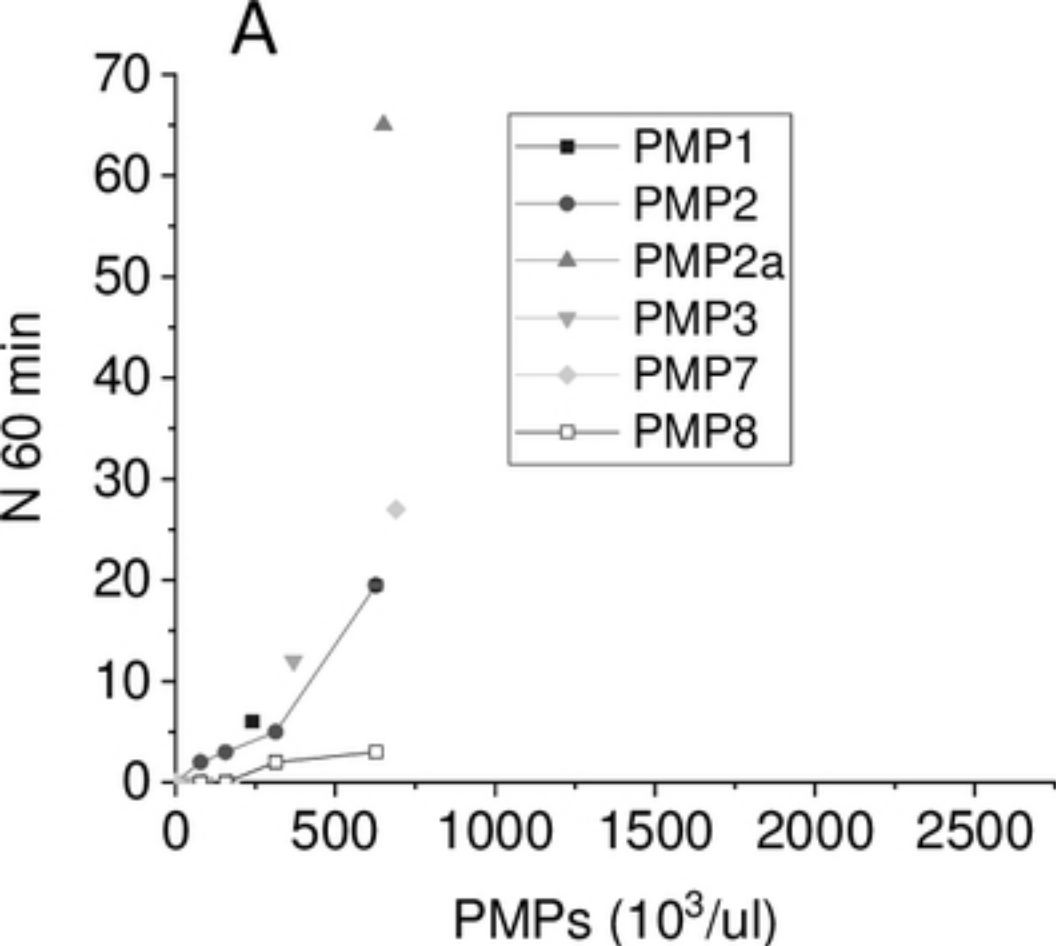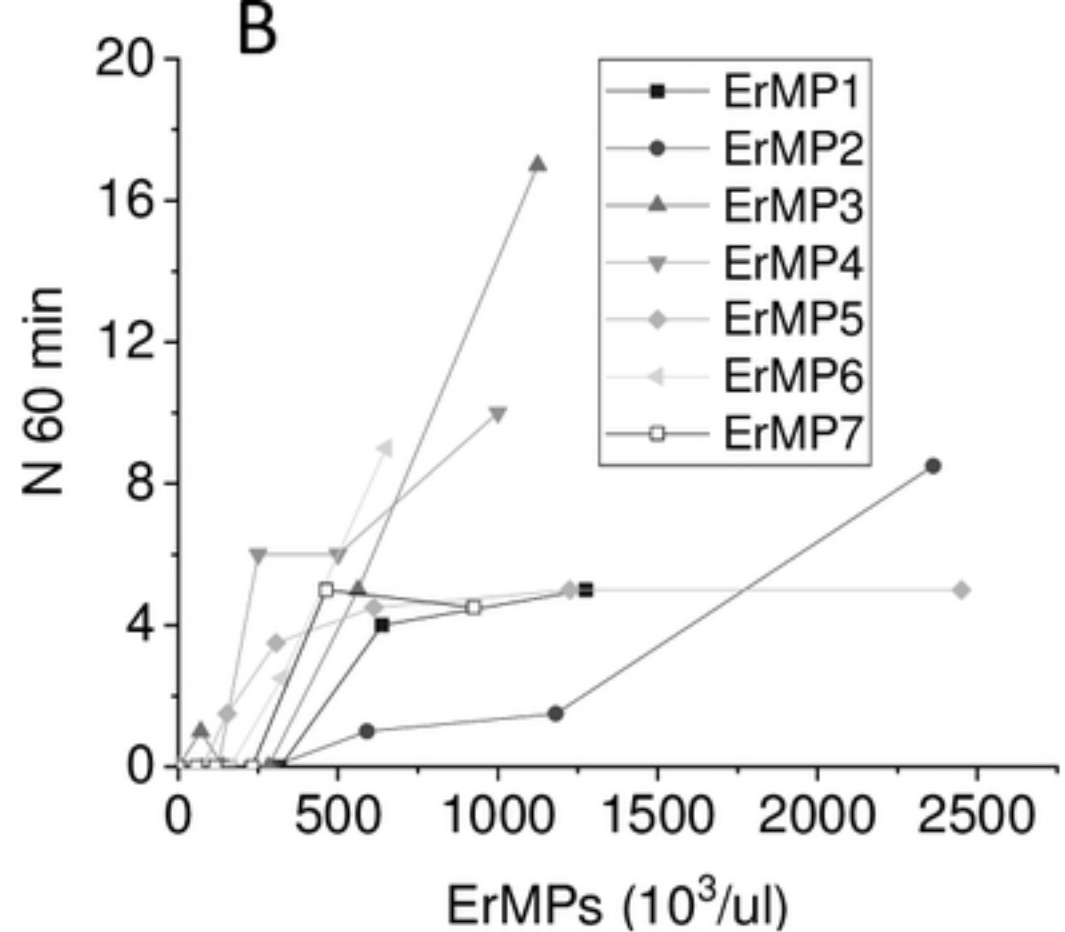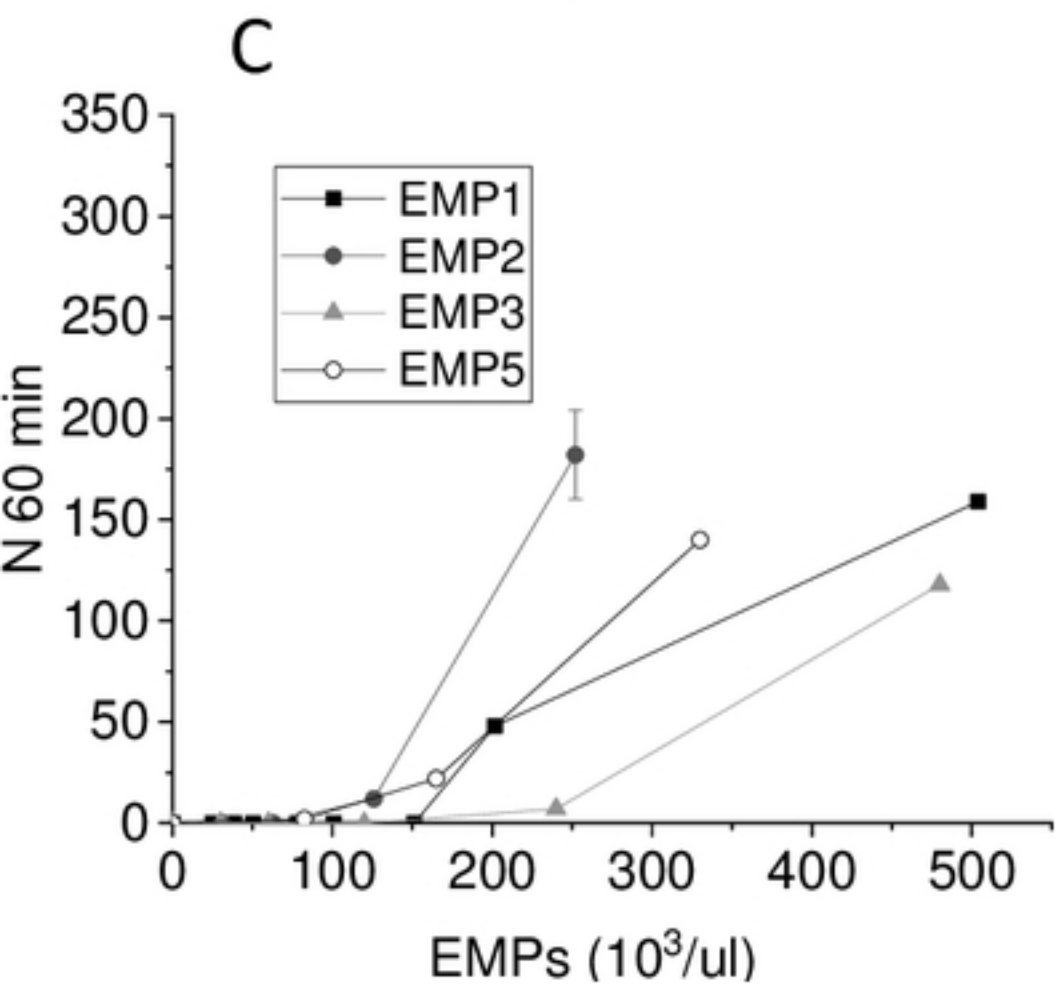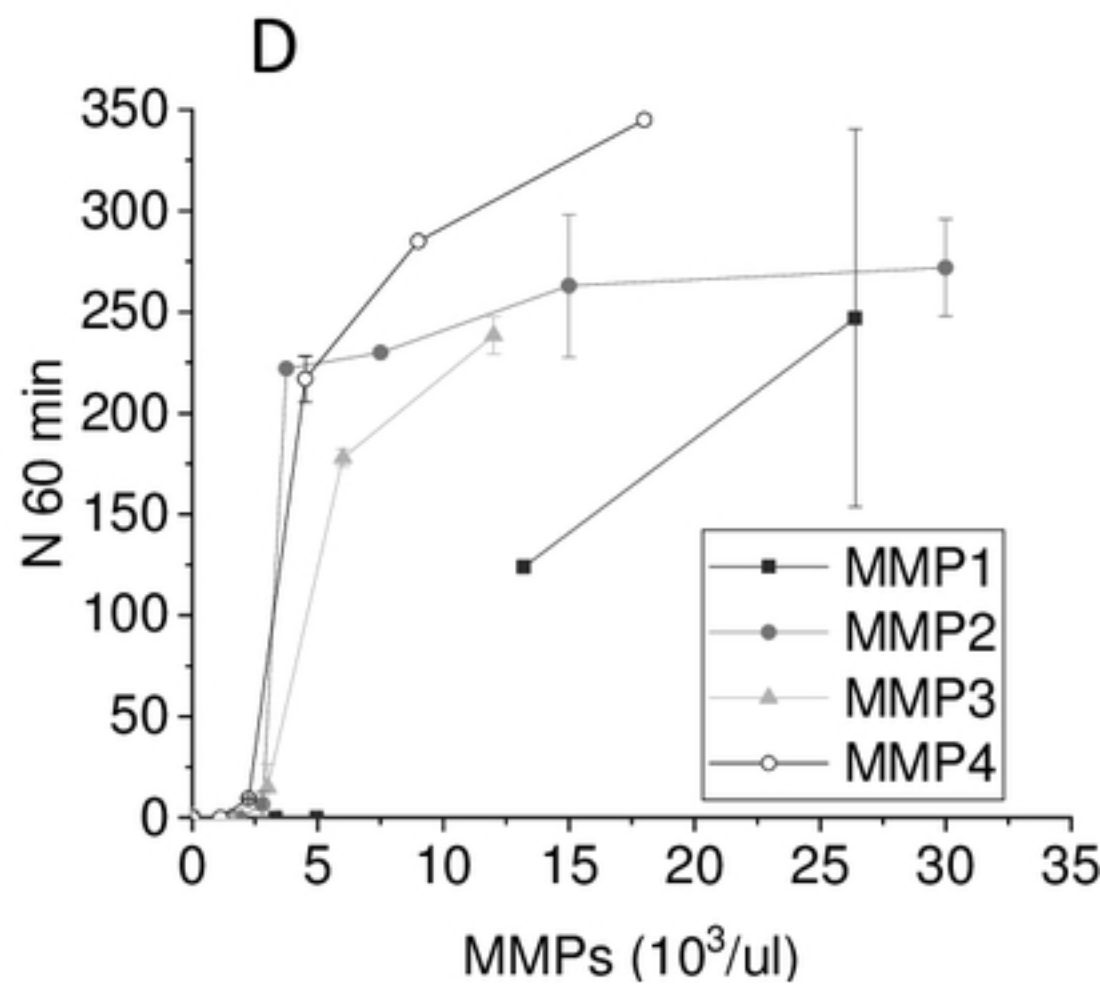

Figure

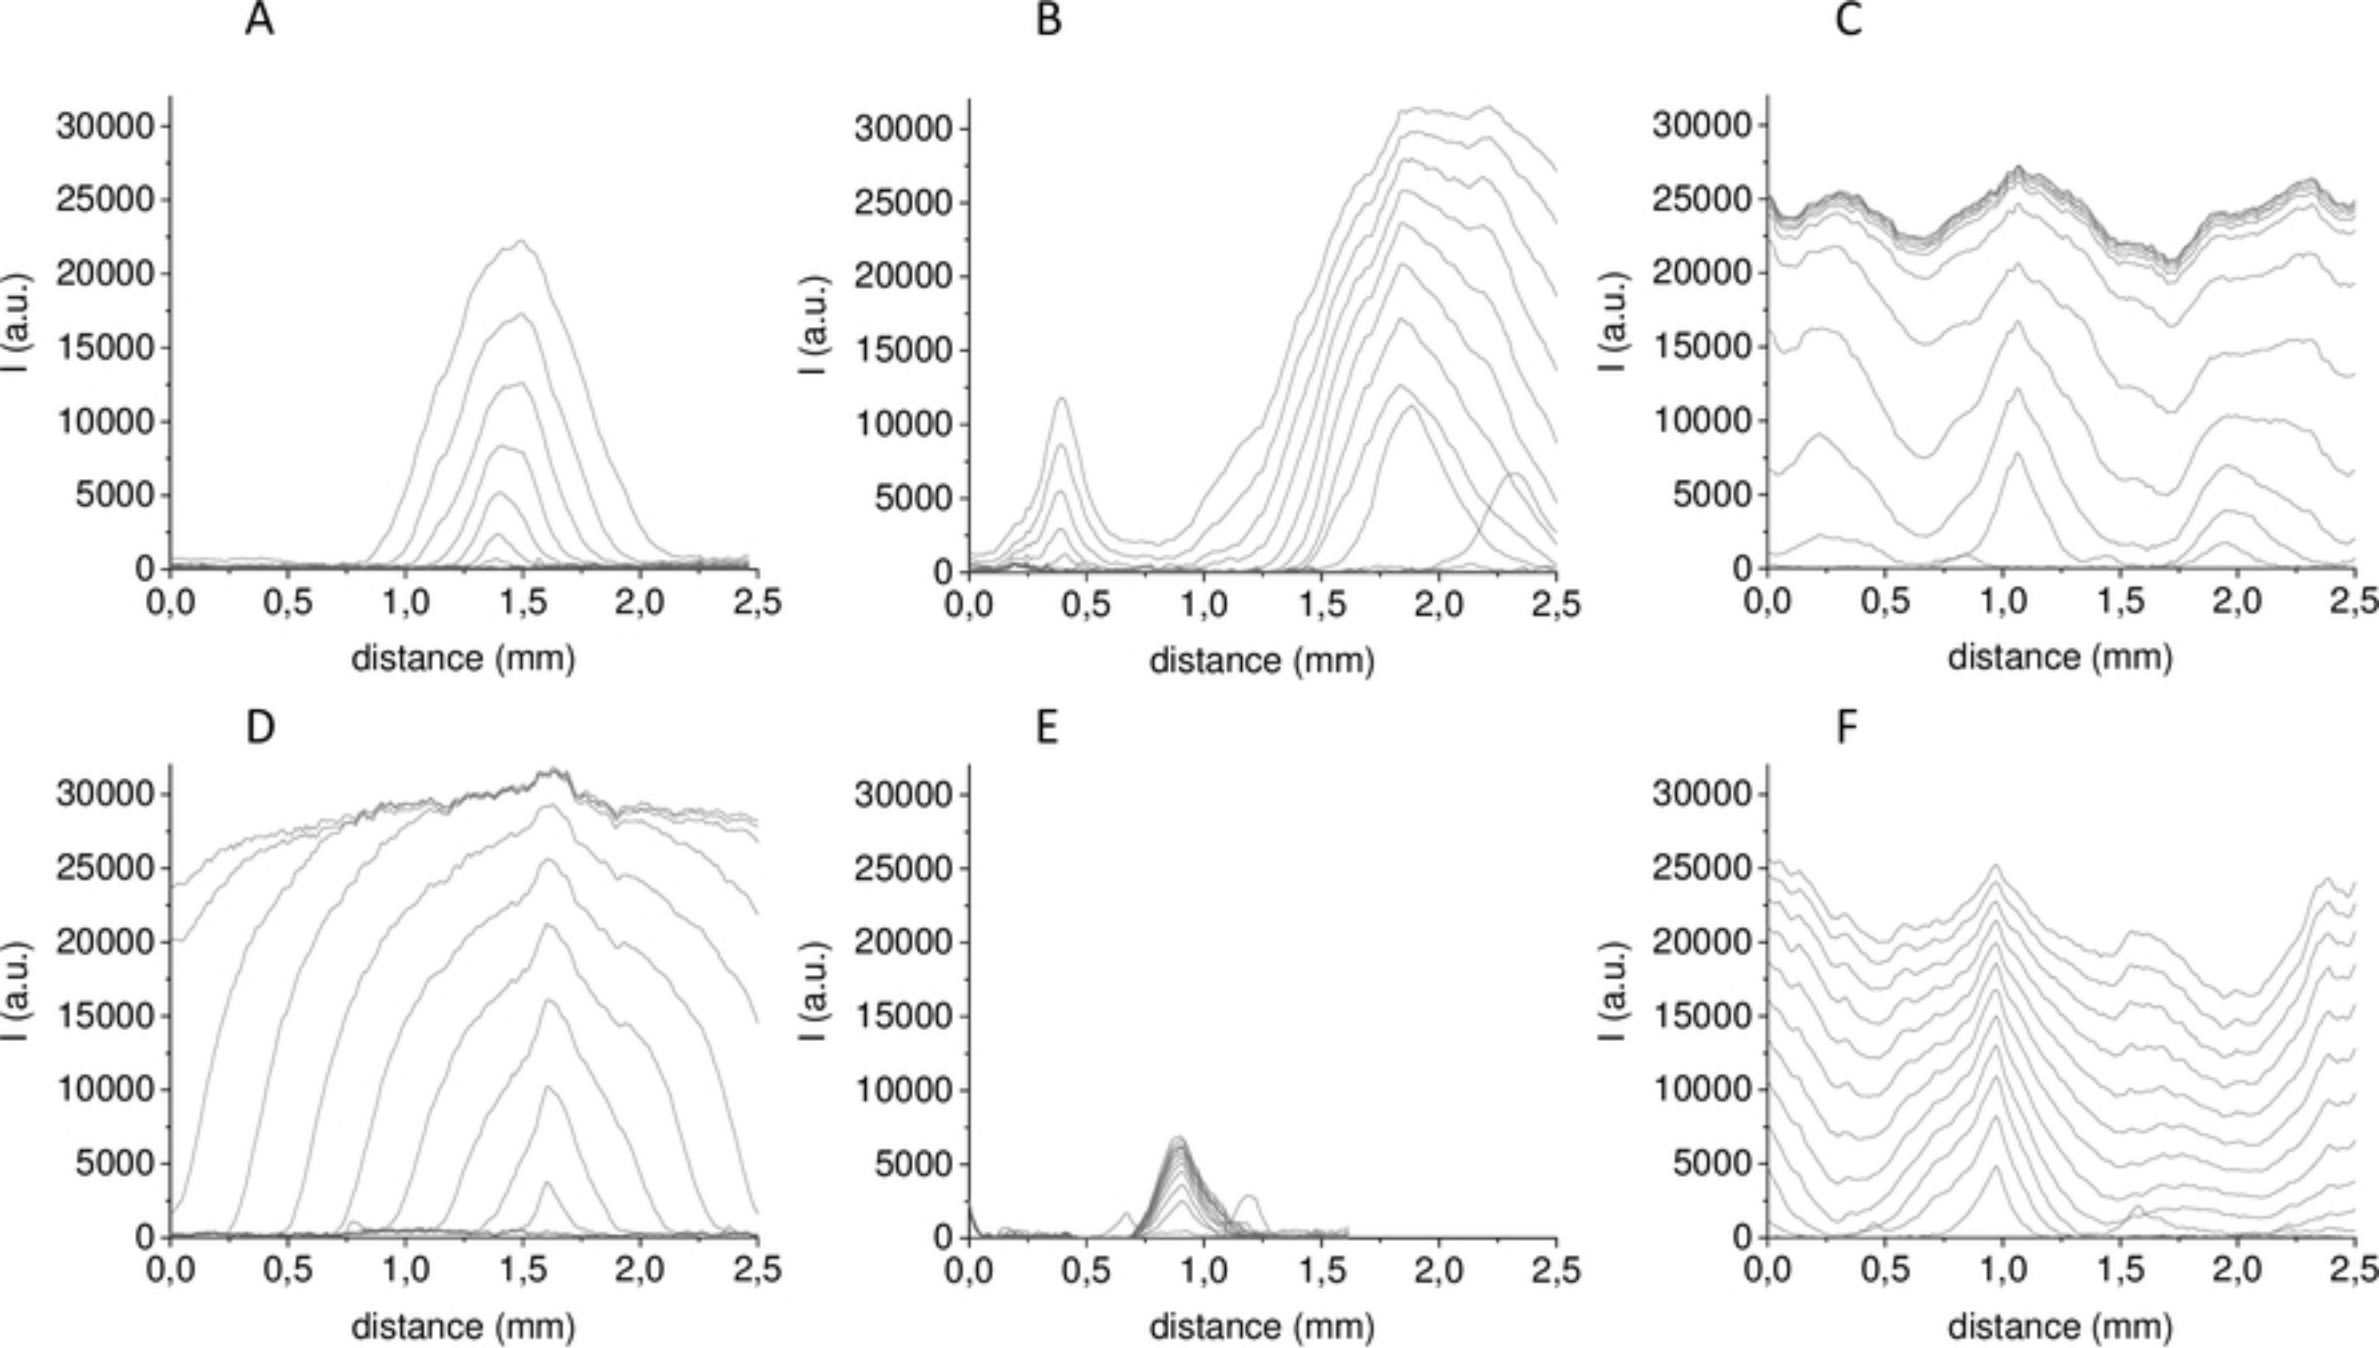

Figure

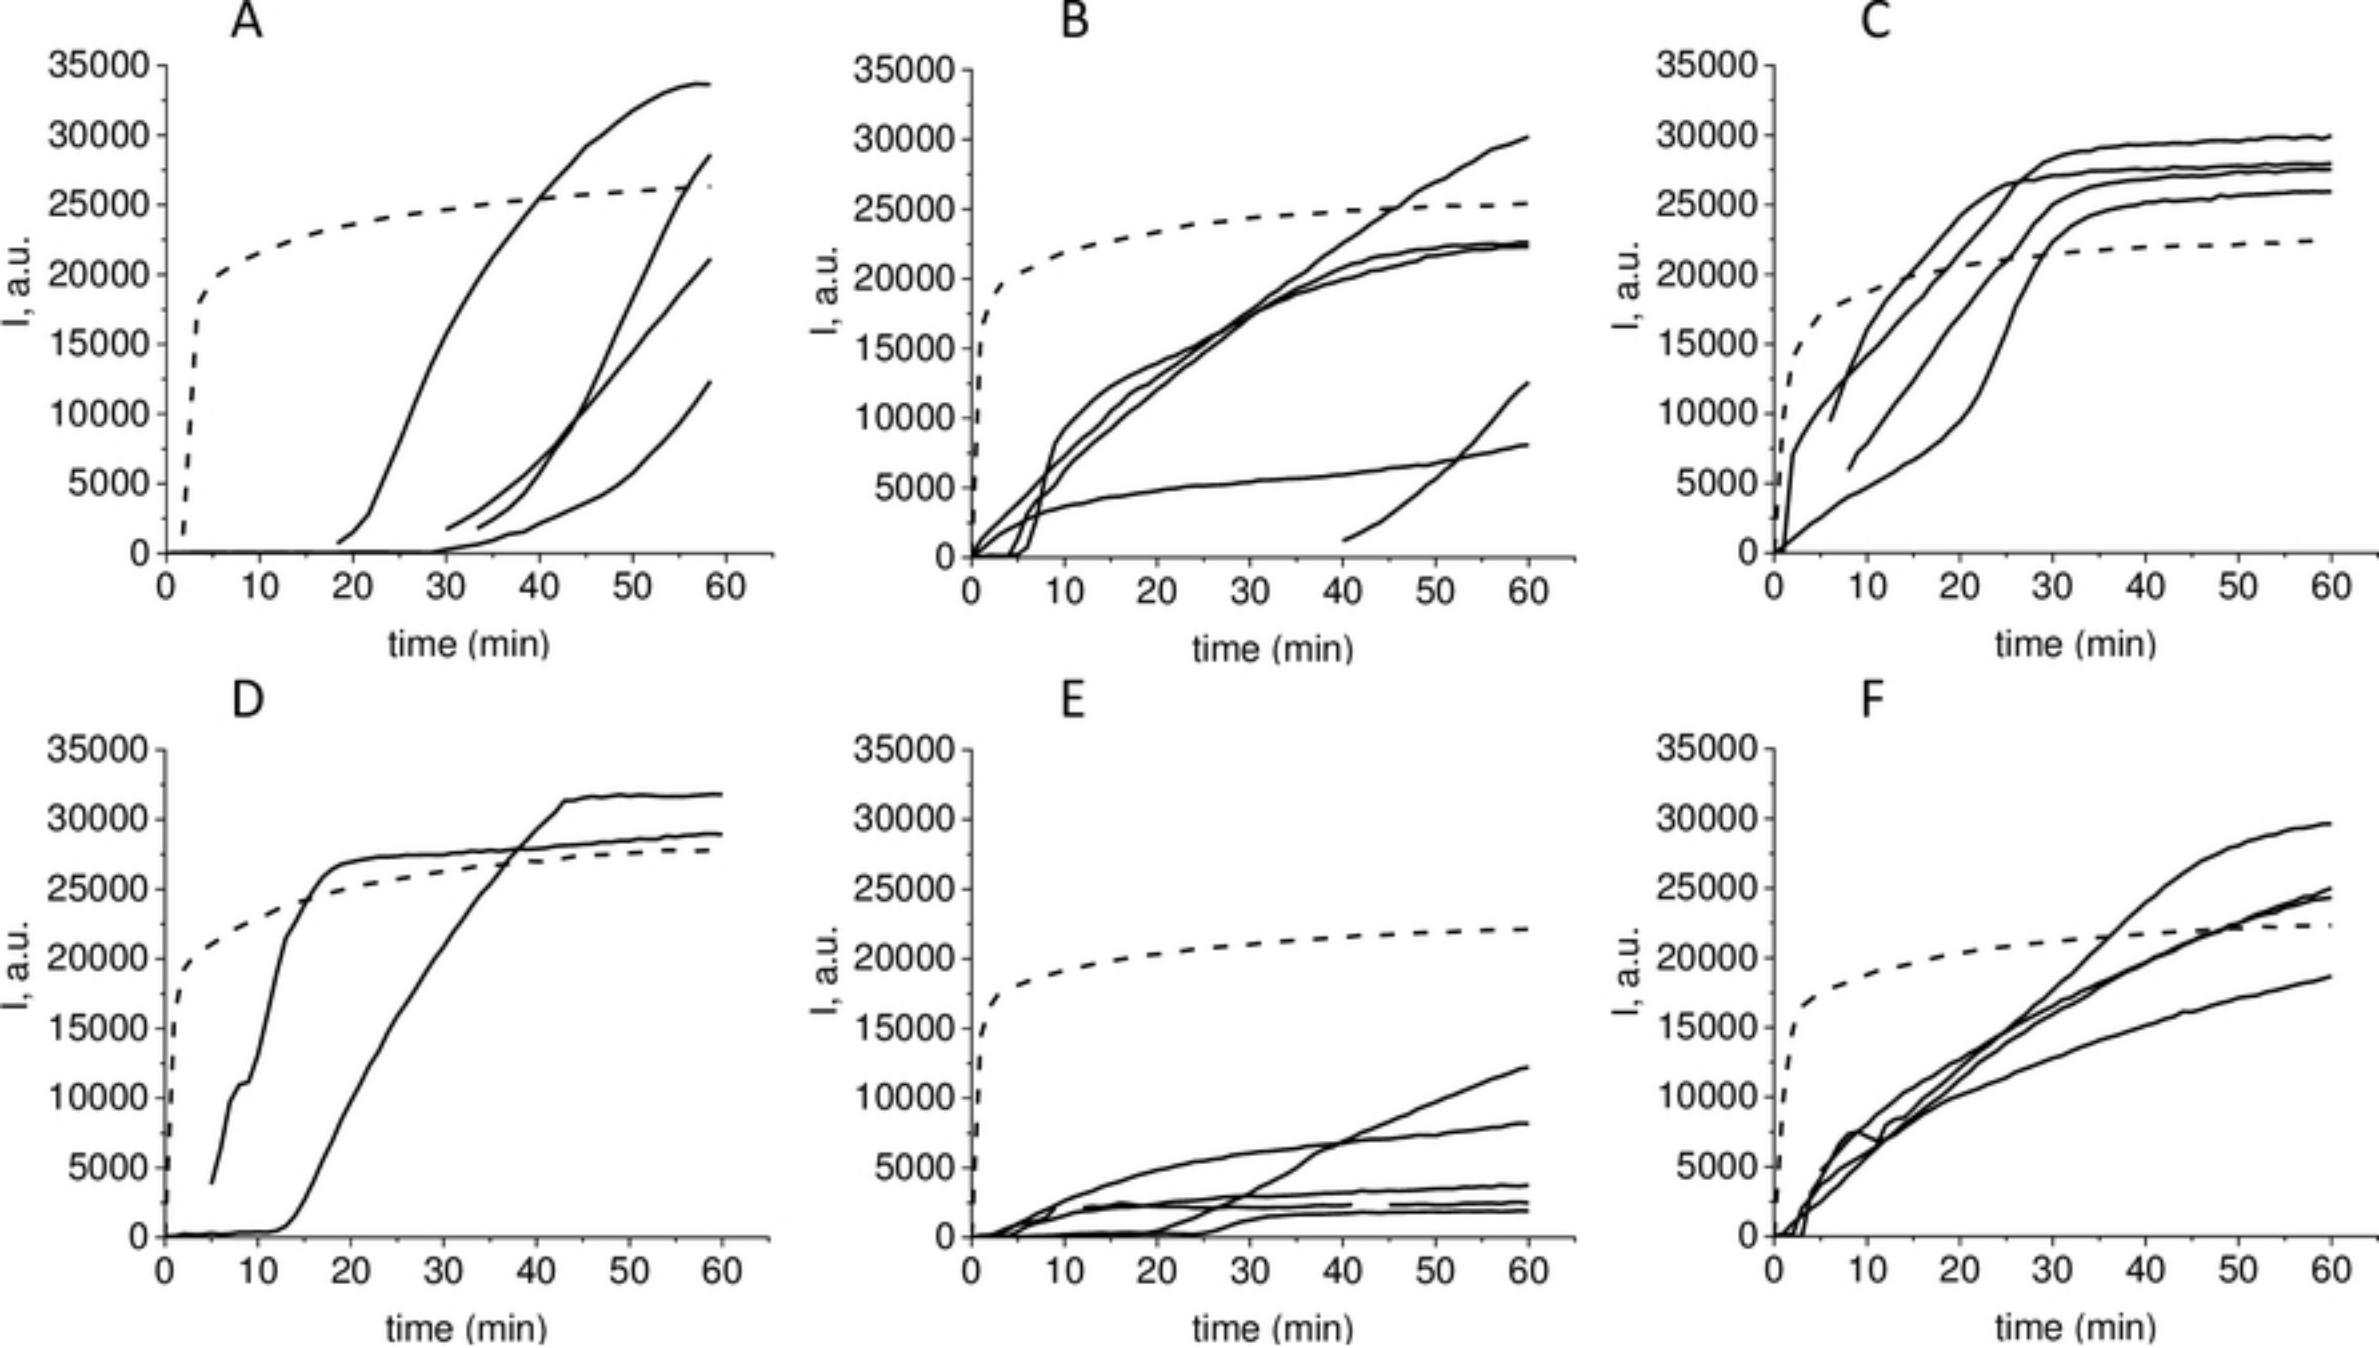

Figure

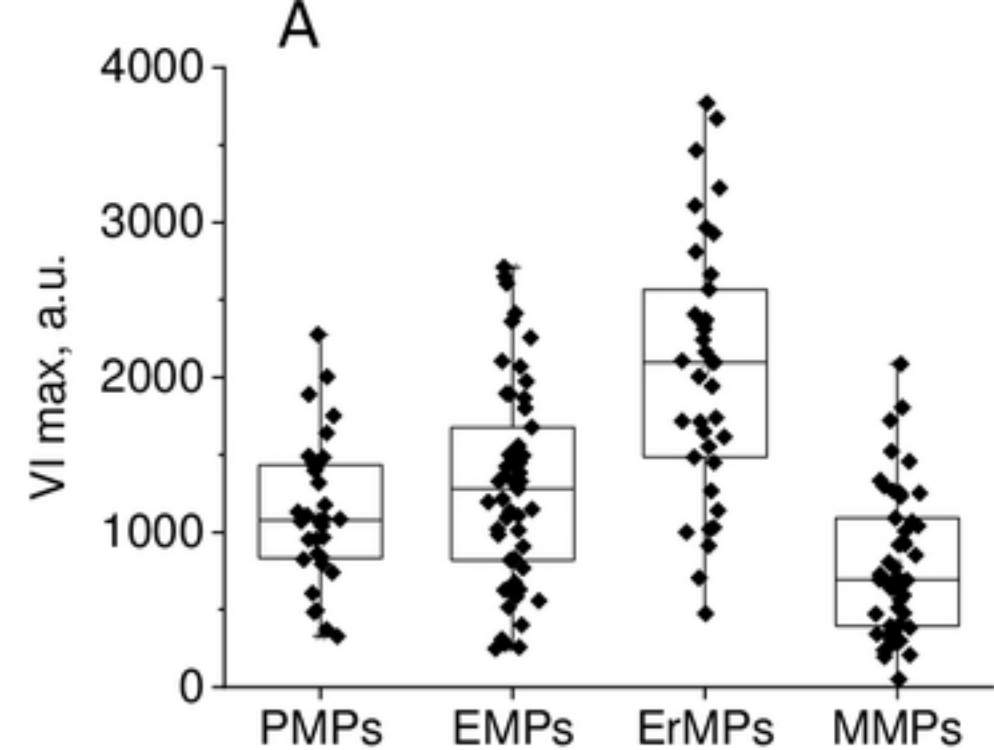

|       | PMPs | EMPs | ErMPs                                 | MMPs                                   |
|-------|------|------|---------------------------------------|----------------------------------------|
| PMPs  | 1    | 0,22 | <b><math>3,5 \cdot 10^{-6}</math></b> | <b>0,002</b>                           |
| EMPs  |      | 1    | <b><math>4 \cdot 10^{-5}</math></b>   | <b><math>8 \cdot 10^{-5}</math></b>    |
| ErMPs |      |      | 1                                     | <b><math>1,4 \cdot 10^{-10}</math></b> |
| MMPs  |      |      |                                       | 1                                      |

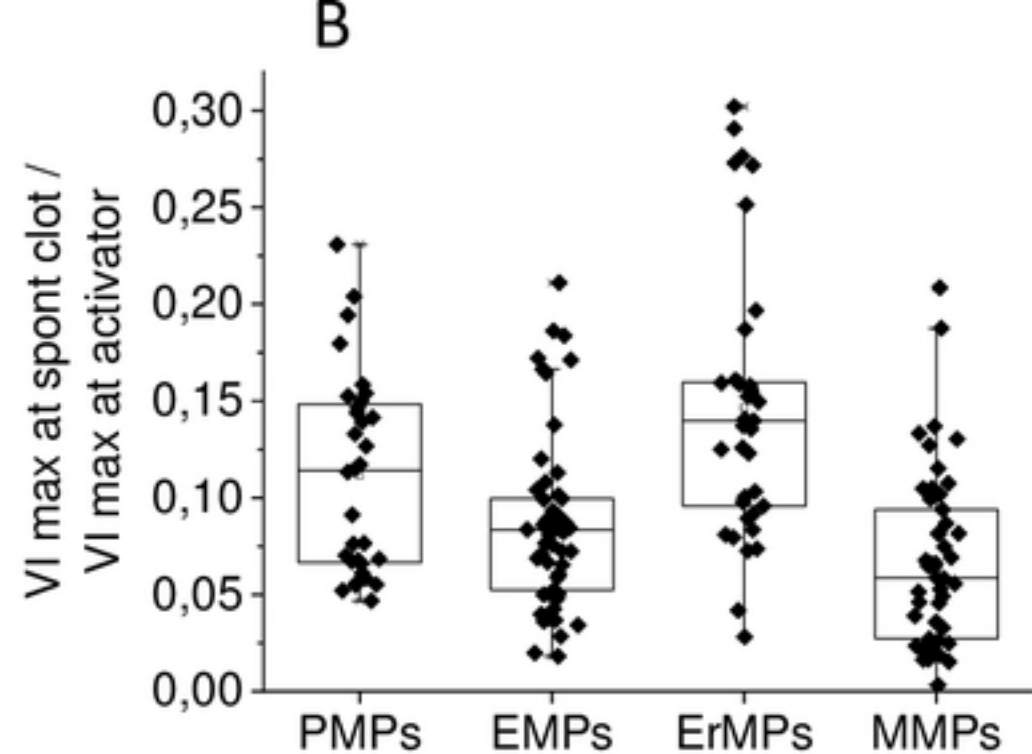

|       | PMPs | EMPs | ErMPs                               | MMPs                                   |
|-------|------|------|-------------------------------------|----------------------------------------|
| PMPs  | 1    | 0,12 | <b>0,021</b>                        | <b><math>1,05 \cdot 10^{-4}</math></b> |
| EMPs  |      | 1    | <b><math>9 \cdot 10^{-7}</math></b> | 0,06                                   |
| ErMPs |      |      | 1                                   | <b><math>3 \cdot 10^{-8}</math></b>    |
| MMPs  |      |      |                                     | 1                                      |

Figure

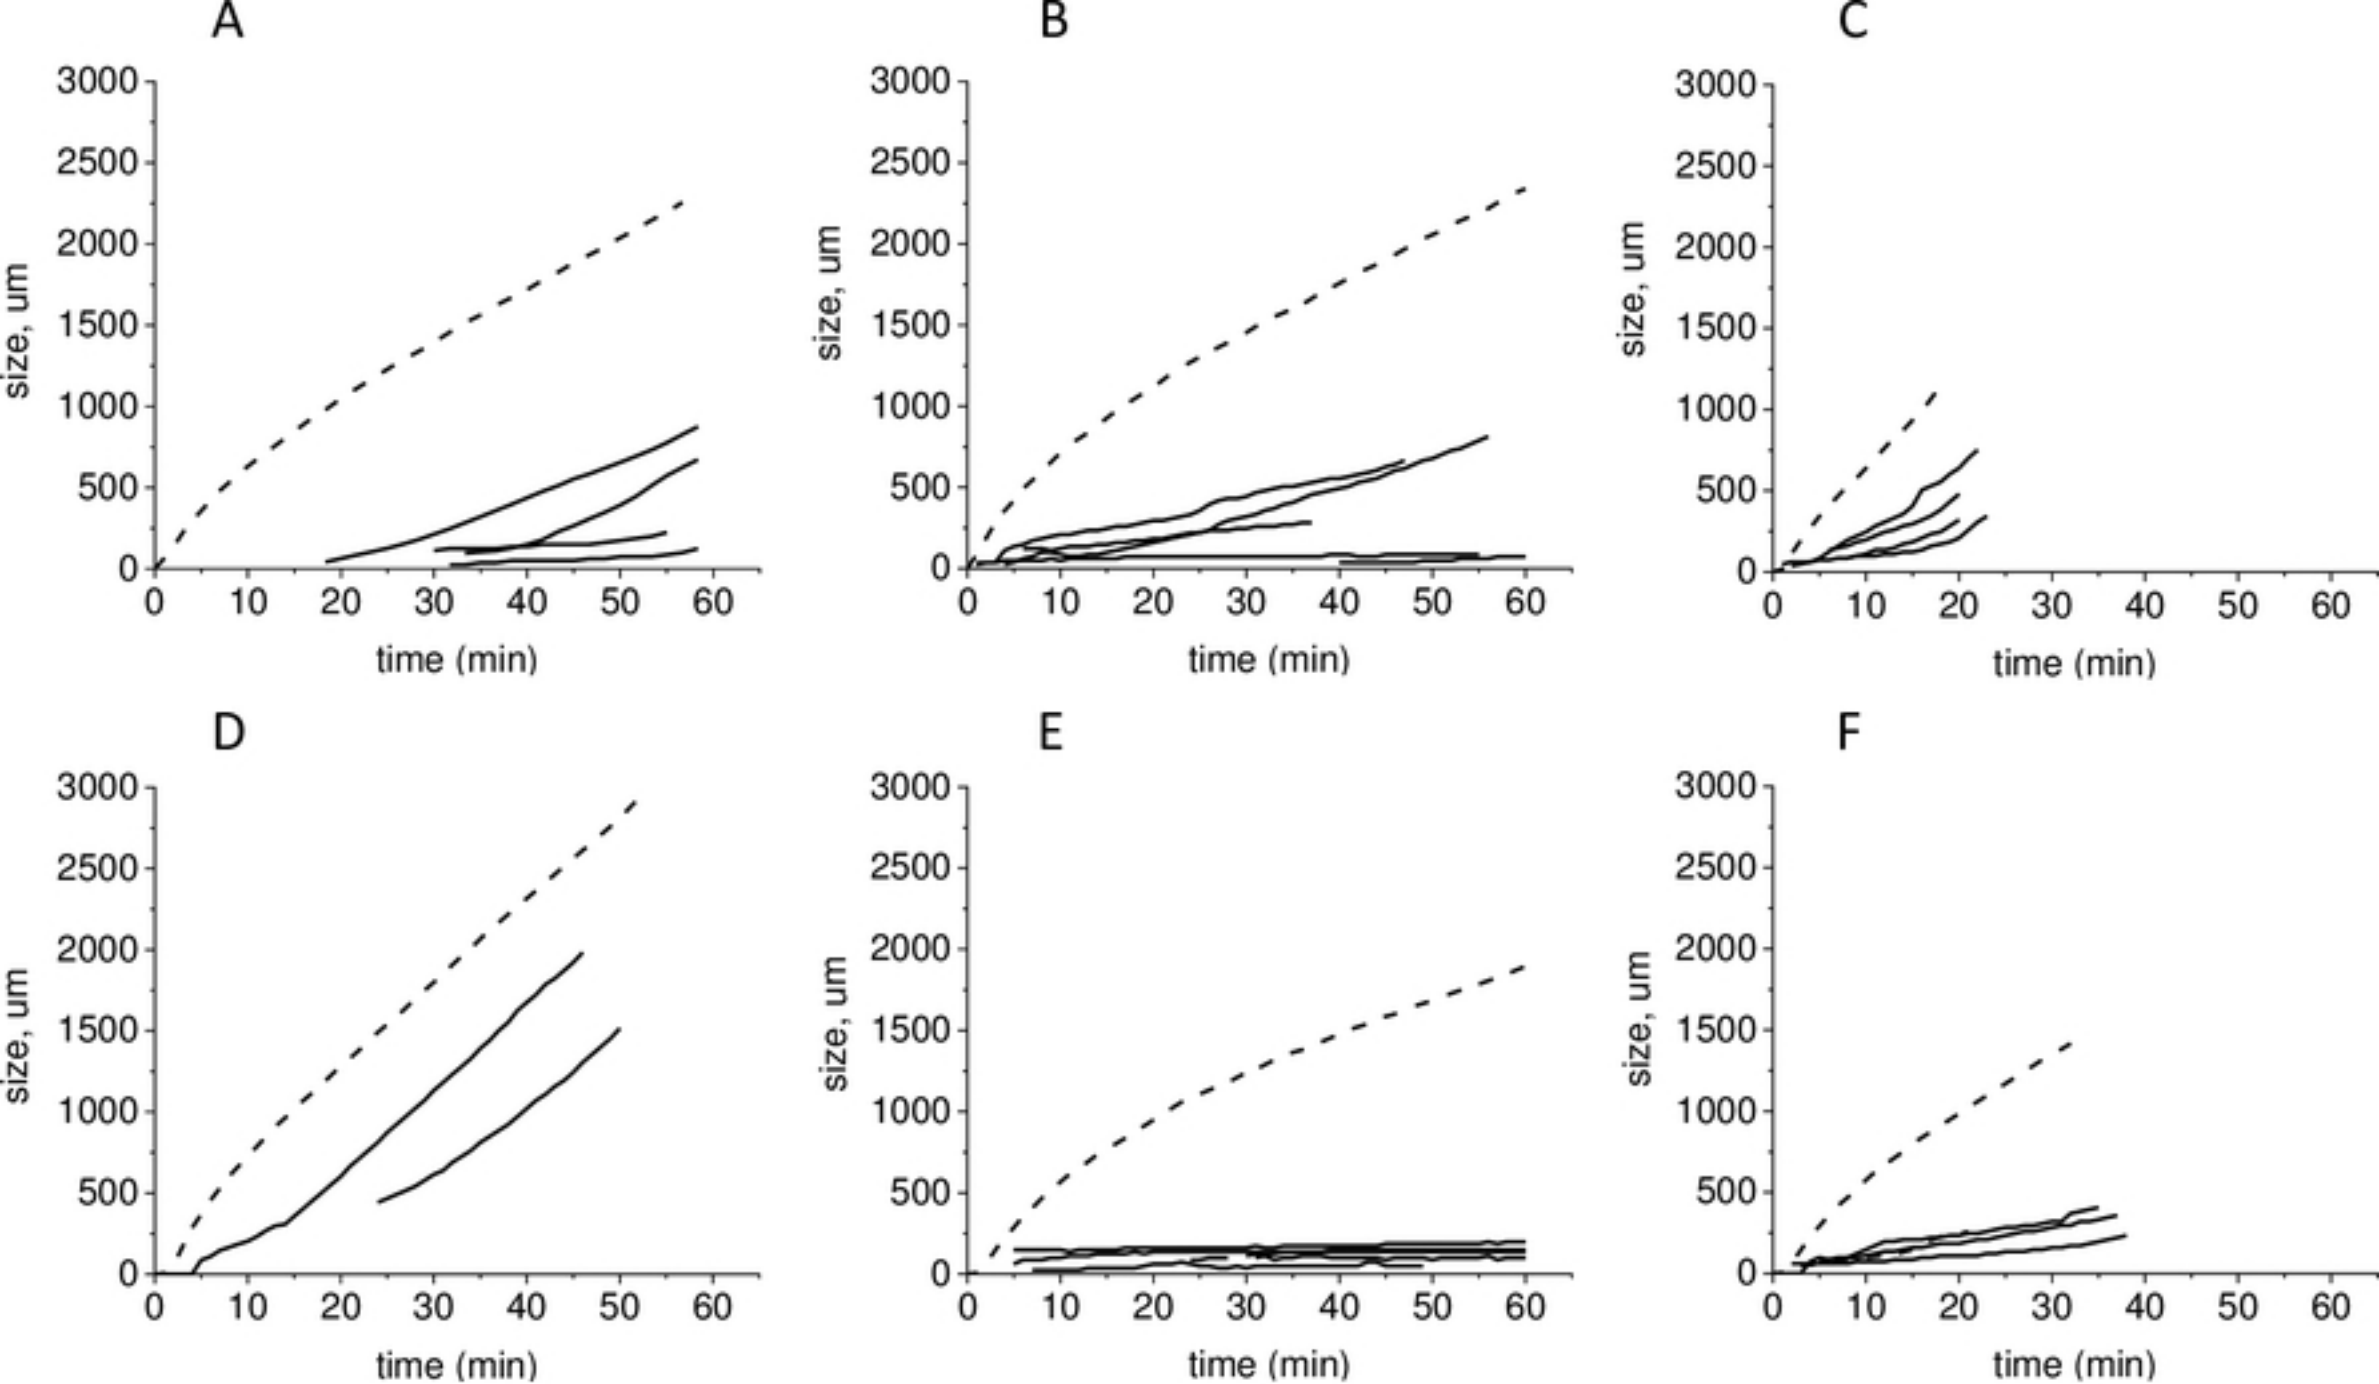

Figure

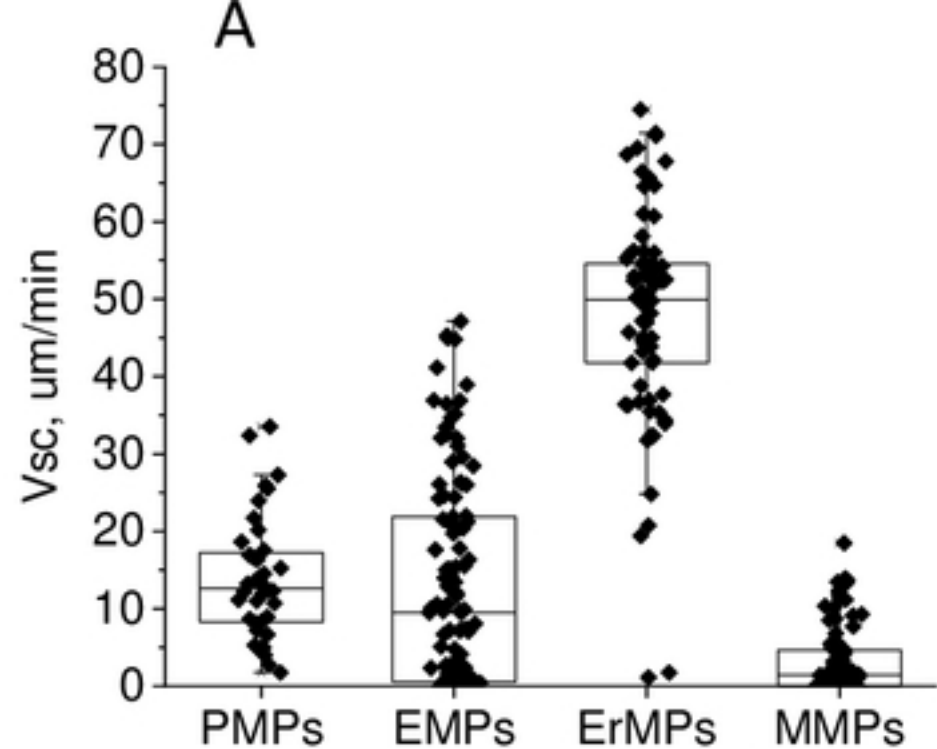

|       | PMPs | EMPs  | ErMPs                | MMPs                 |
|-------|------|-------|----------------------|----------------------|
| PMPs  | 1    | 0,094 | $1,8 \cdot 10^{-16}$ | $2,4 \cdot 10^{-13}$ |
| EMPs  |      | 1     | $1,8 \cdot 10^{-25}$ | $2,4 \cdot 10^{-5}$  |
| ErMPs |      |       | 1                    | $< 10^{-25}$         |
| MMPs  |      |       |                      | 1                    |

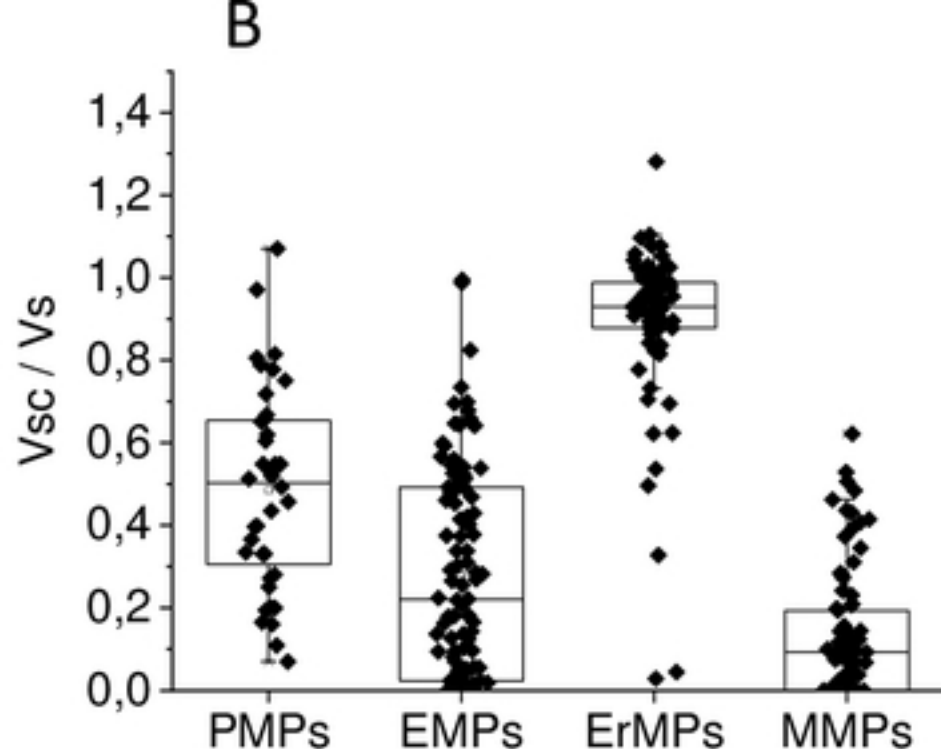

|       | PMPs | EMPs                | ErMPs                | MMPs               |
|-------|------|---------------------|----------------------|--------------------|
| PMPs  | 1    | $2,4 \cdot 10^{-5}$ | $1,2 \cdot 10^{-12}$ | $4 \cdot 10^{-13}$ |
| EMPs  |      | 1                   | $6 \cdot 10^{-26}$   | $9 \cdot 10^{-4}$  |
| ErMPs |      |                     | 1                    | $< 10^{-25}$       |
| MMPs  |      |                     |                      | 1                  |

Figure

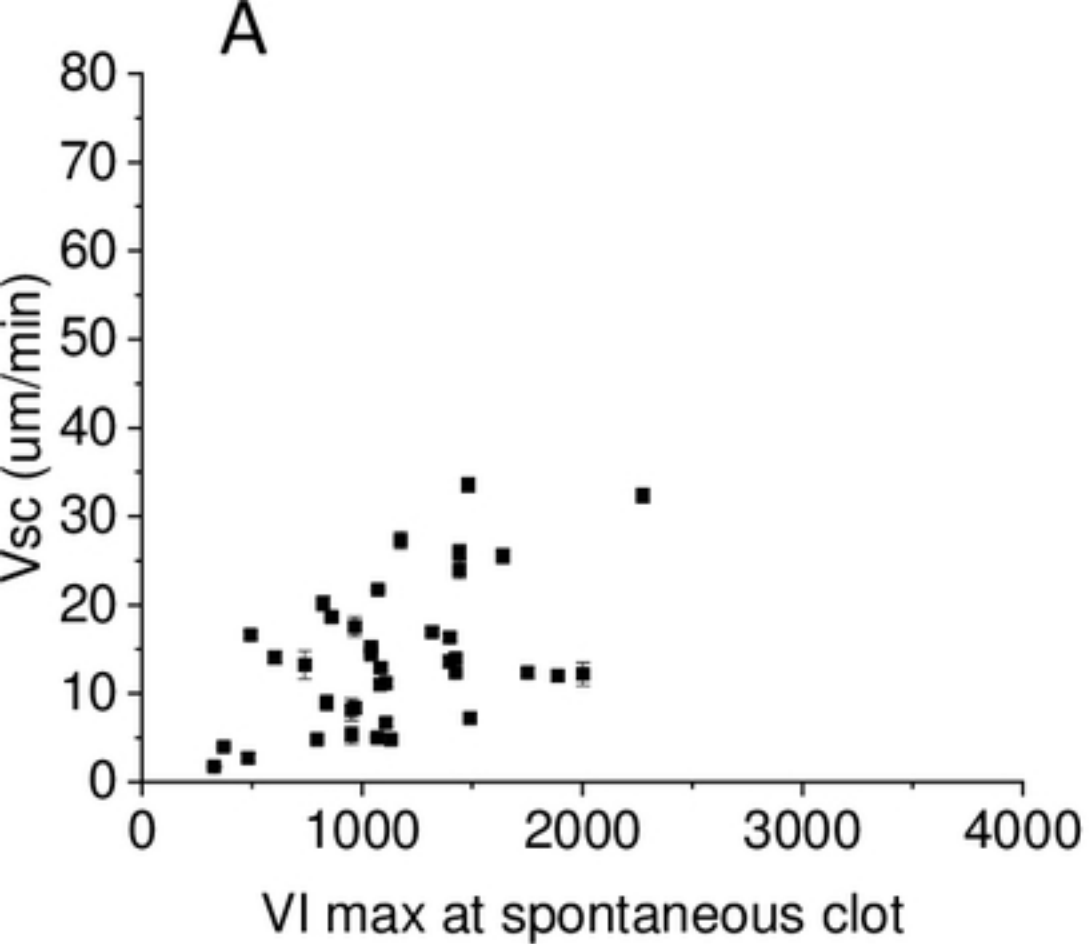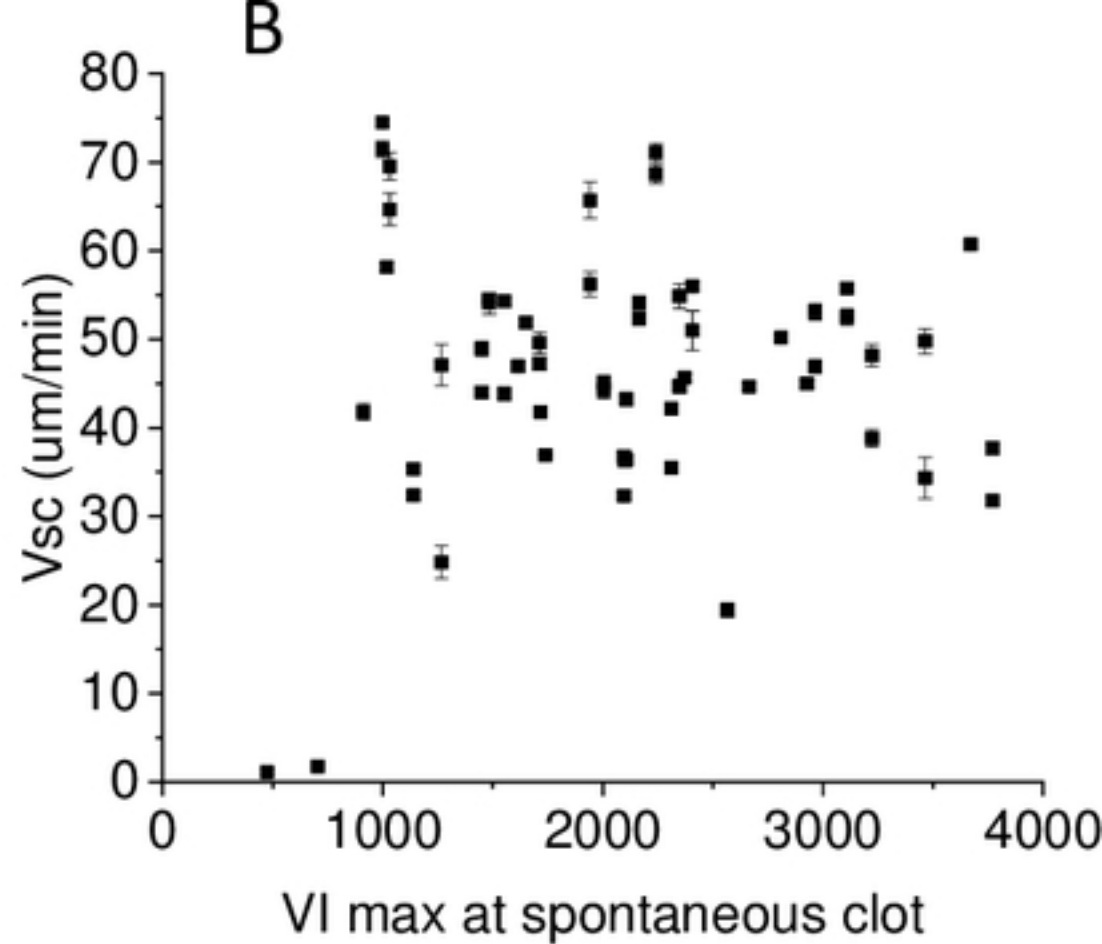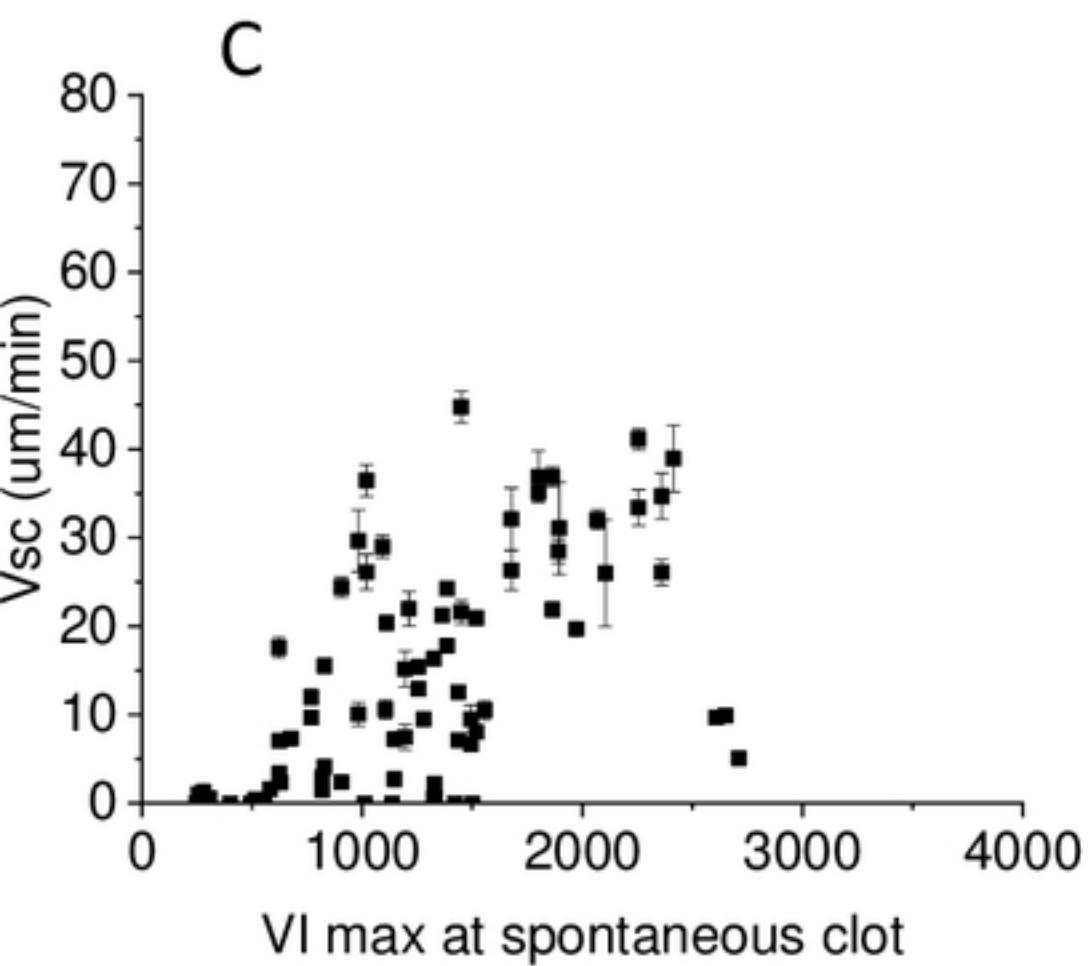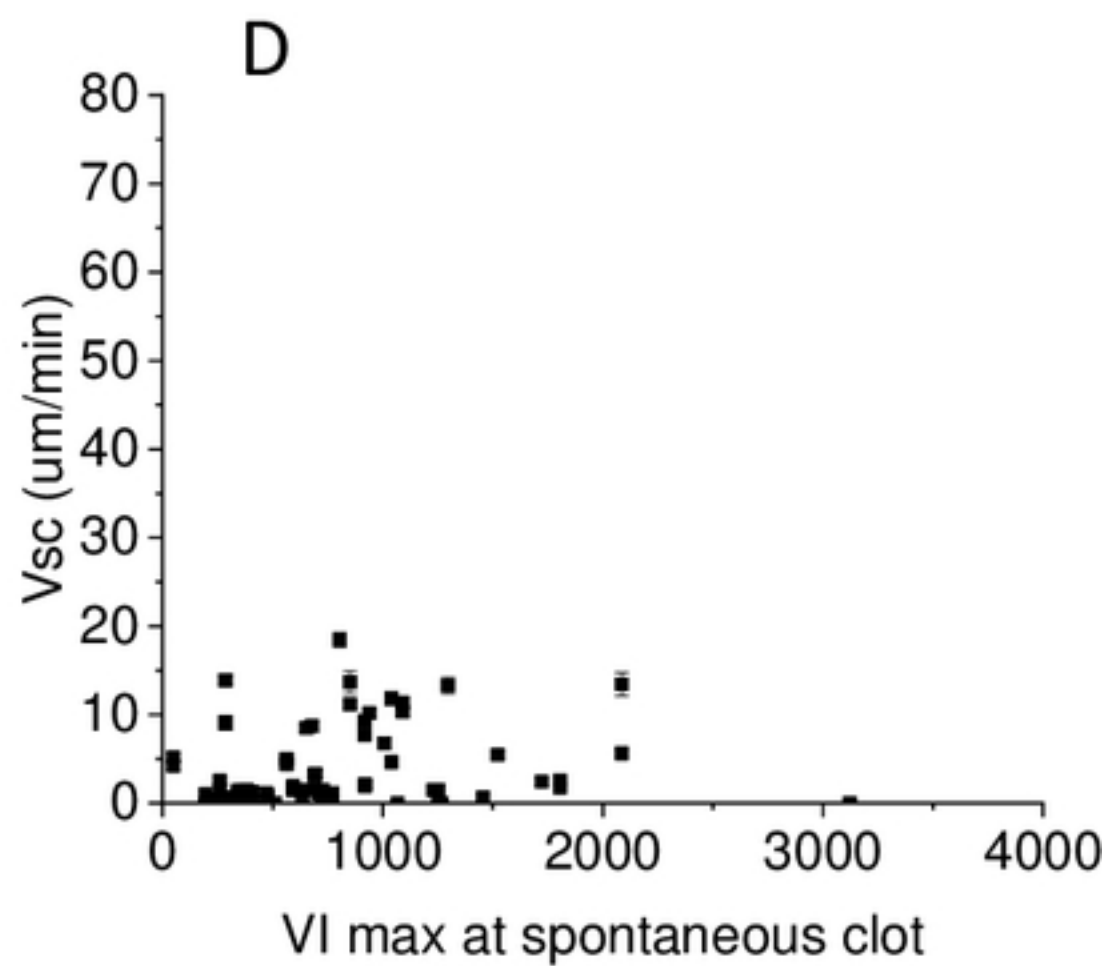

Figure



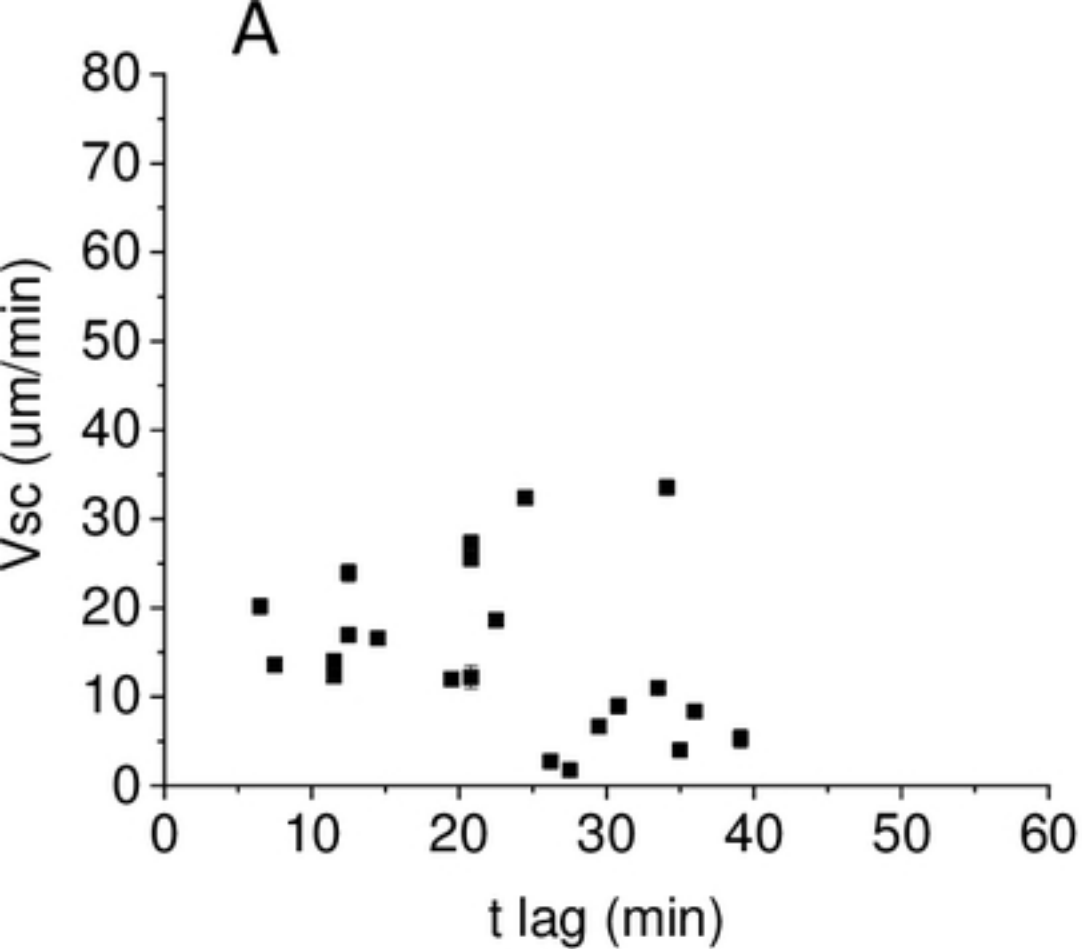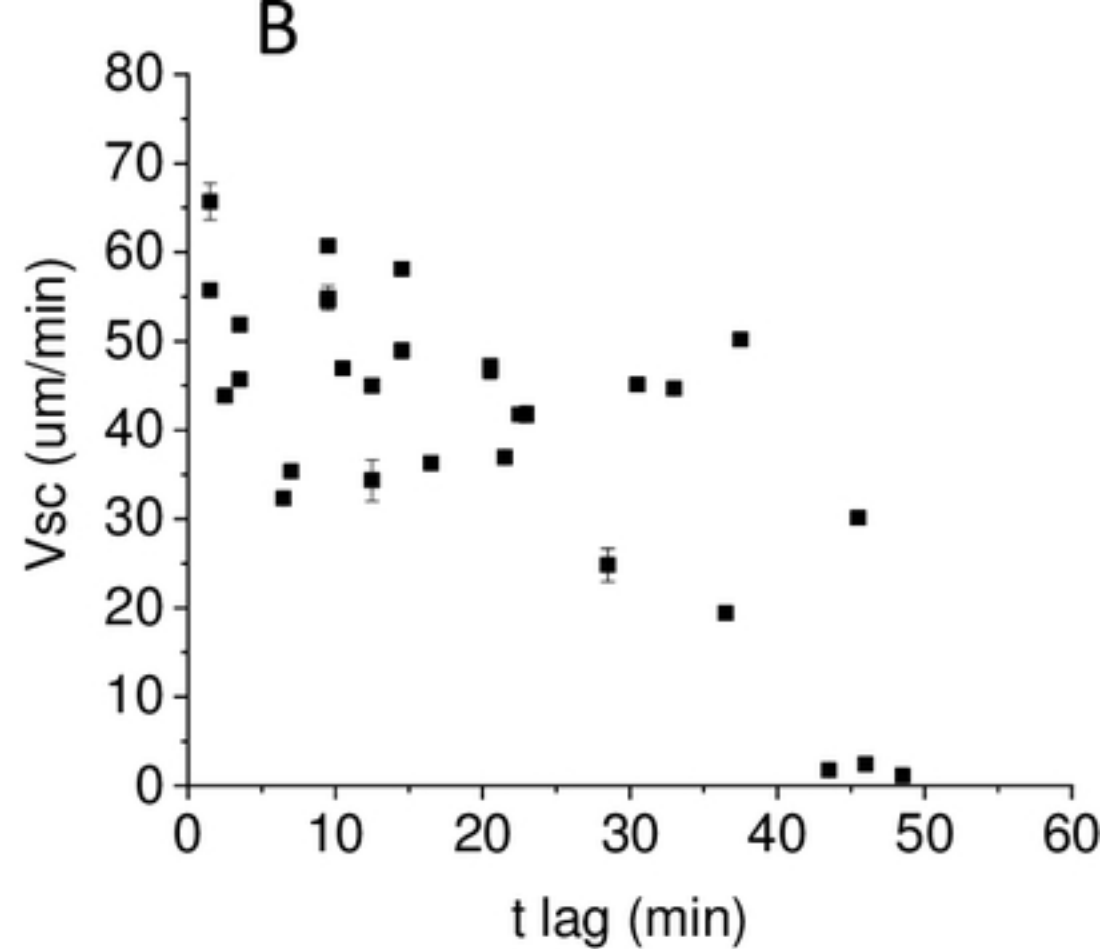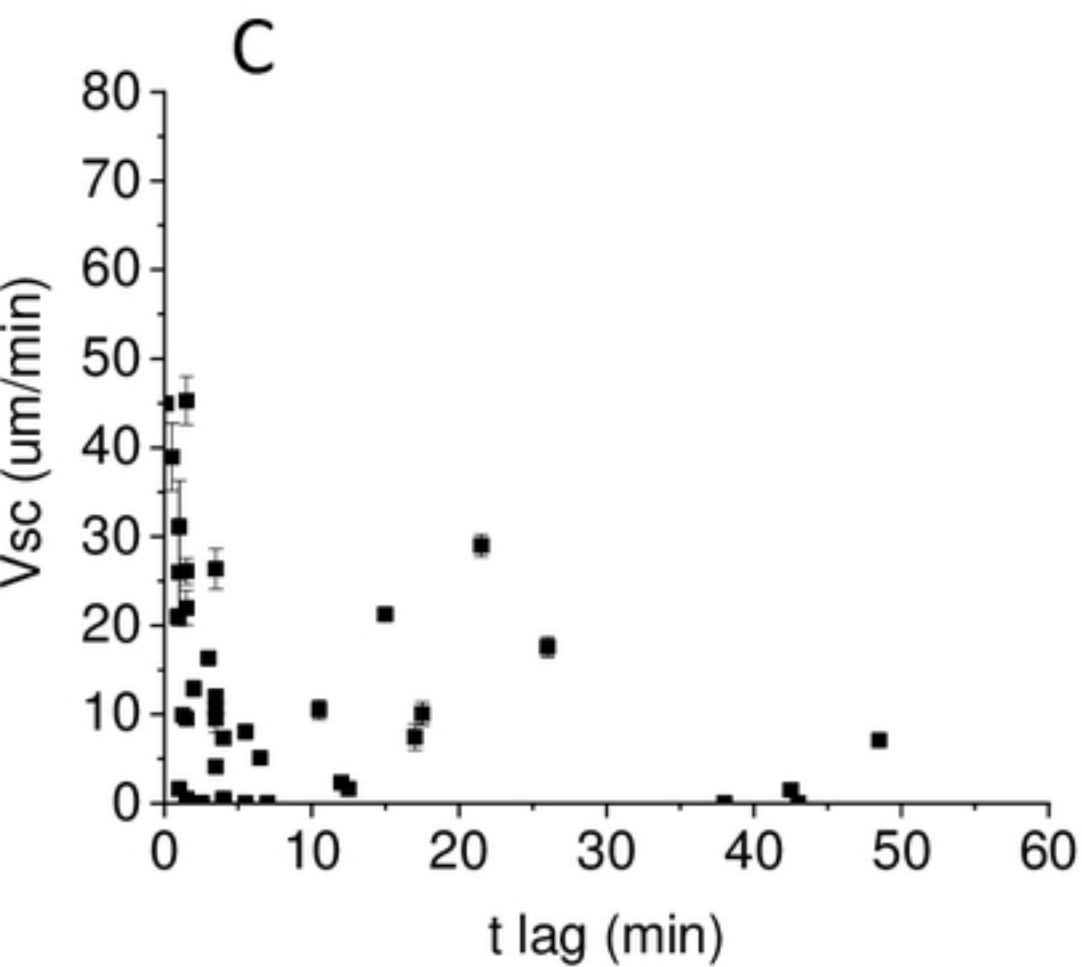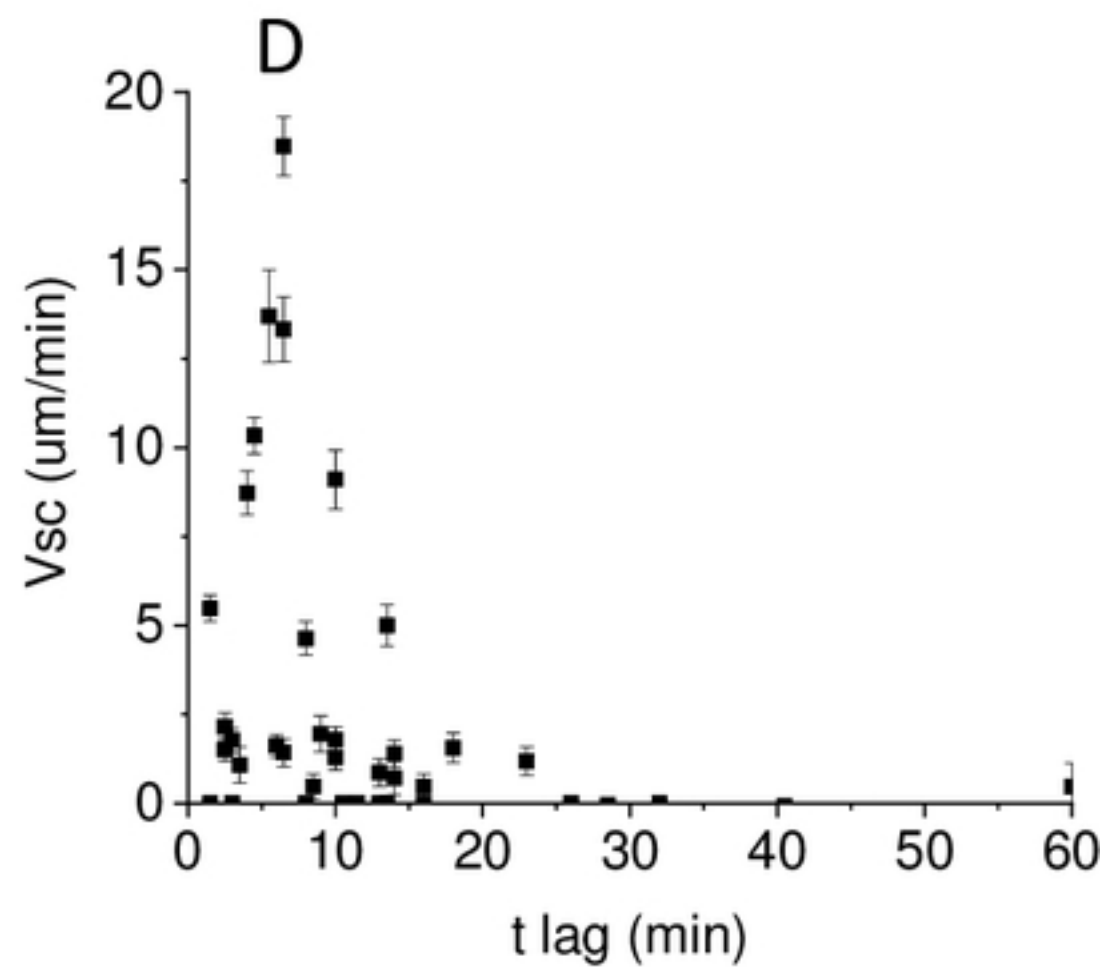

Figure

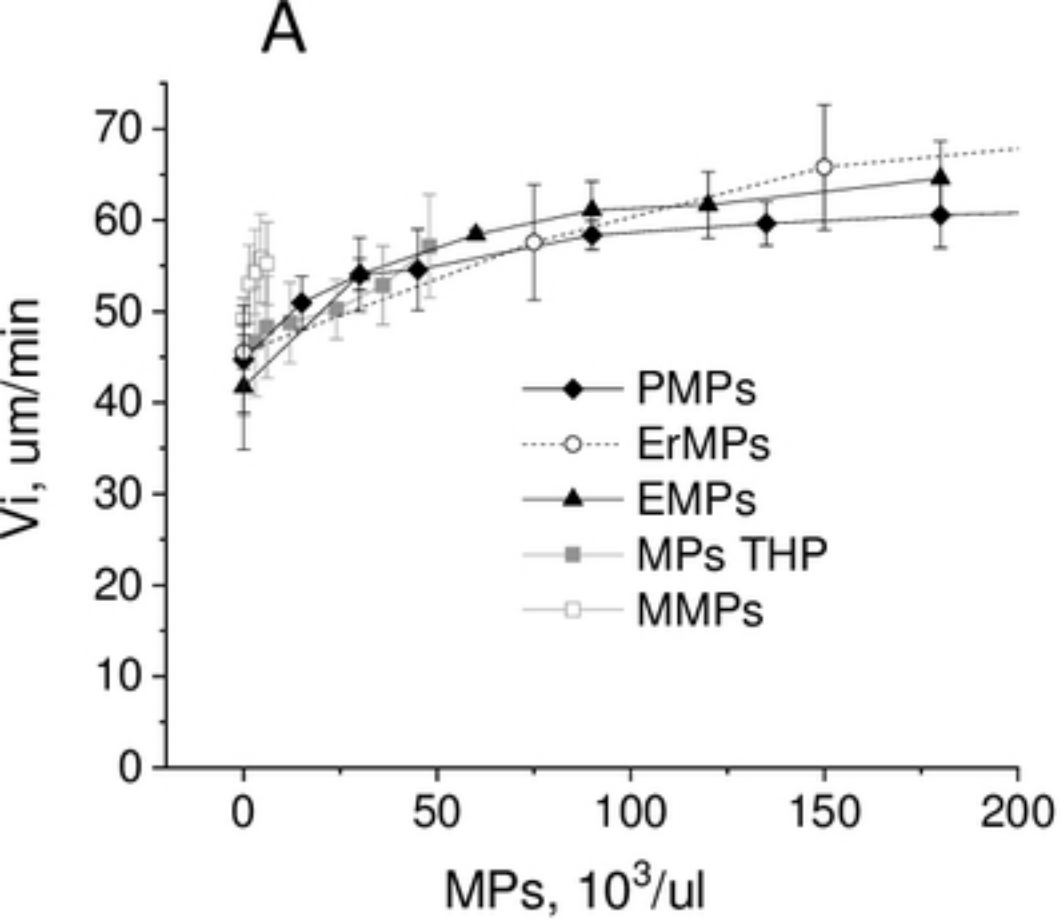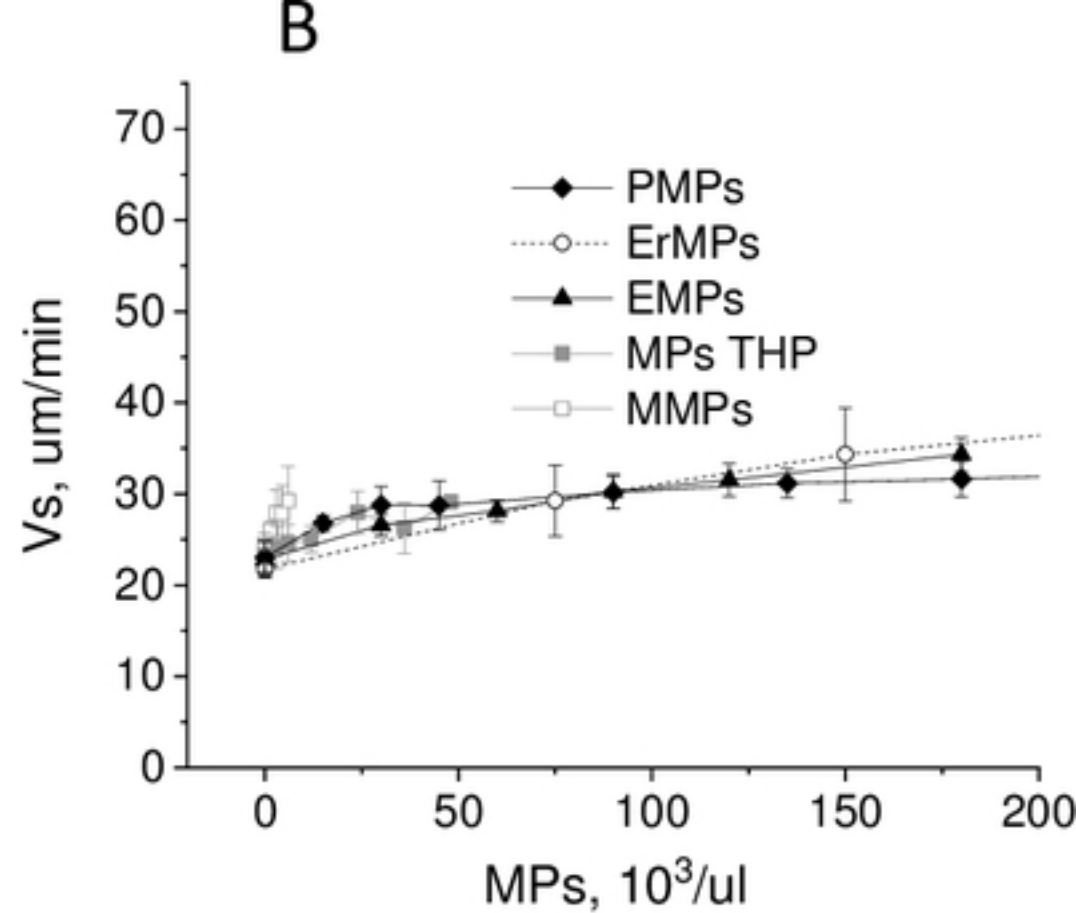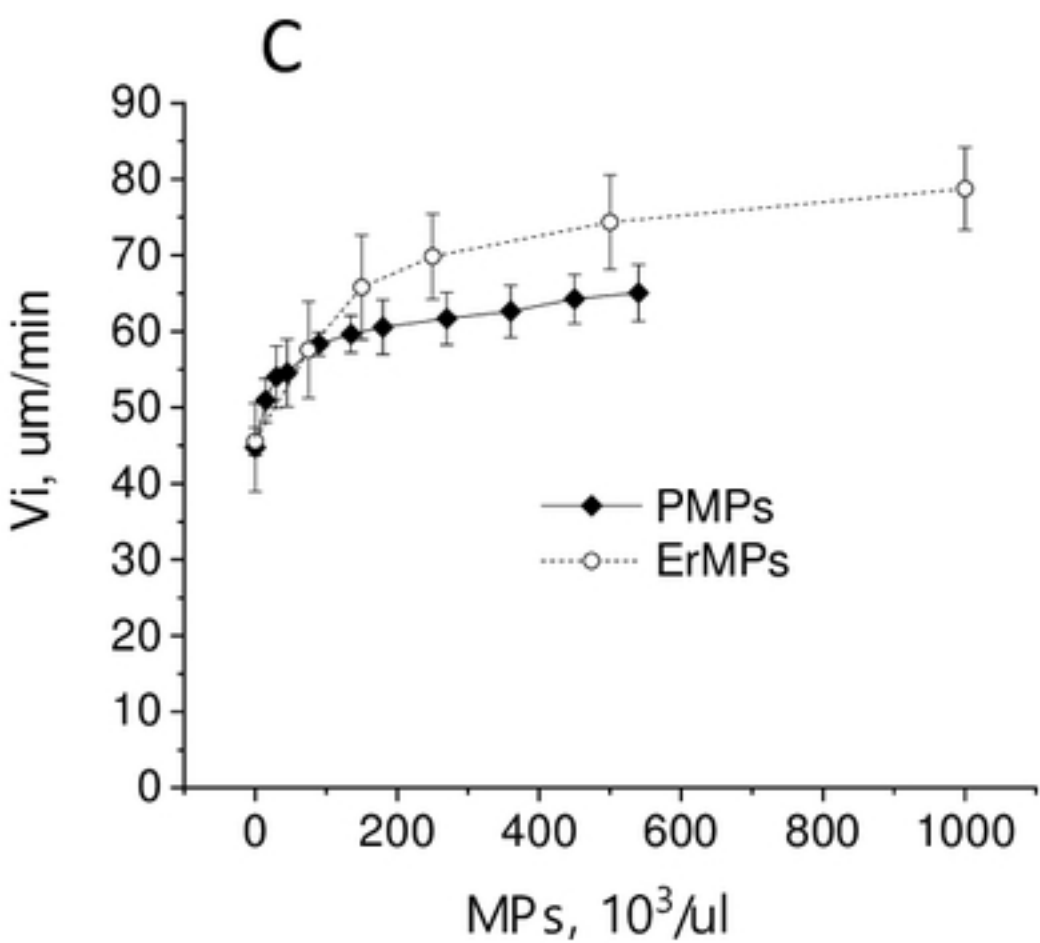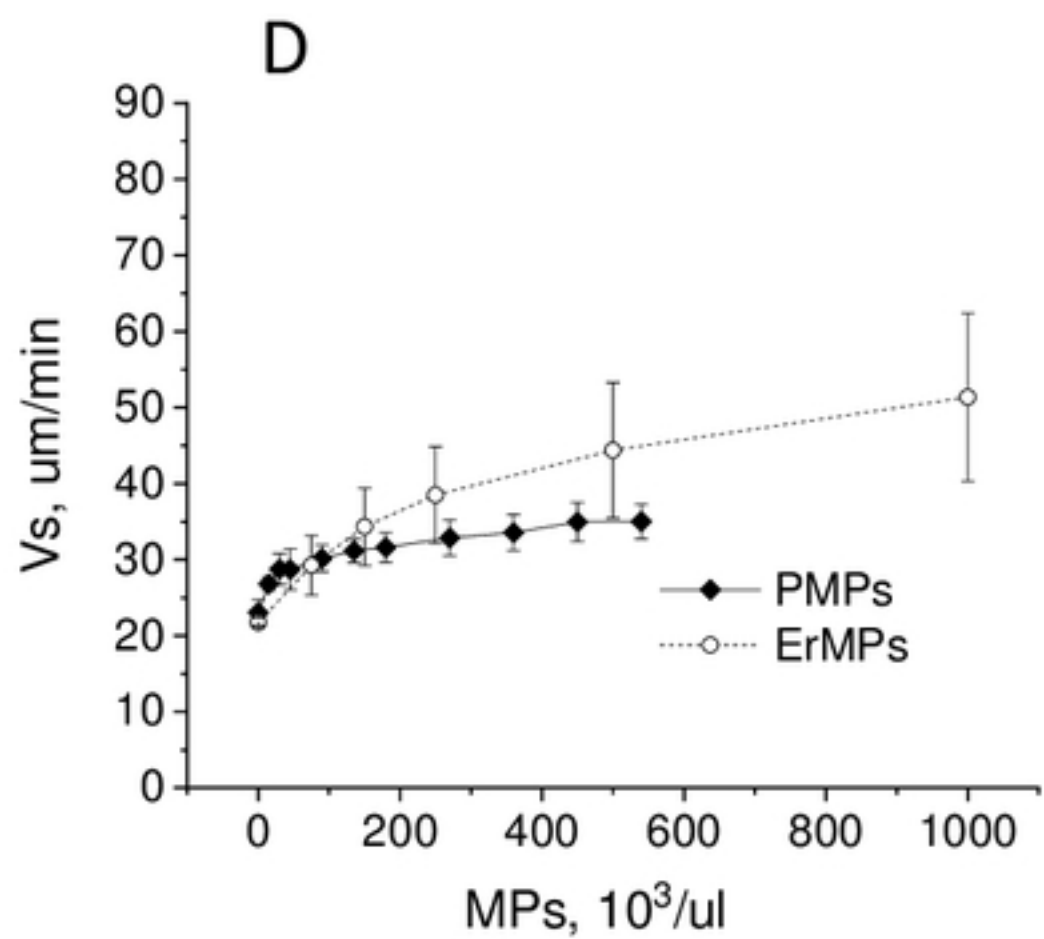

Figure

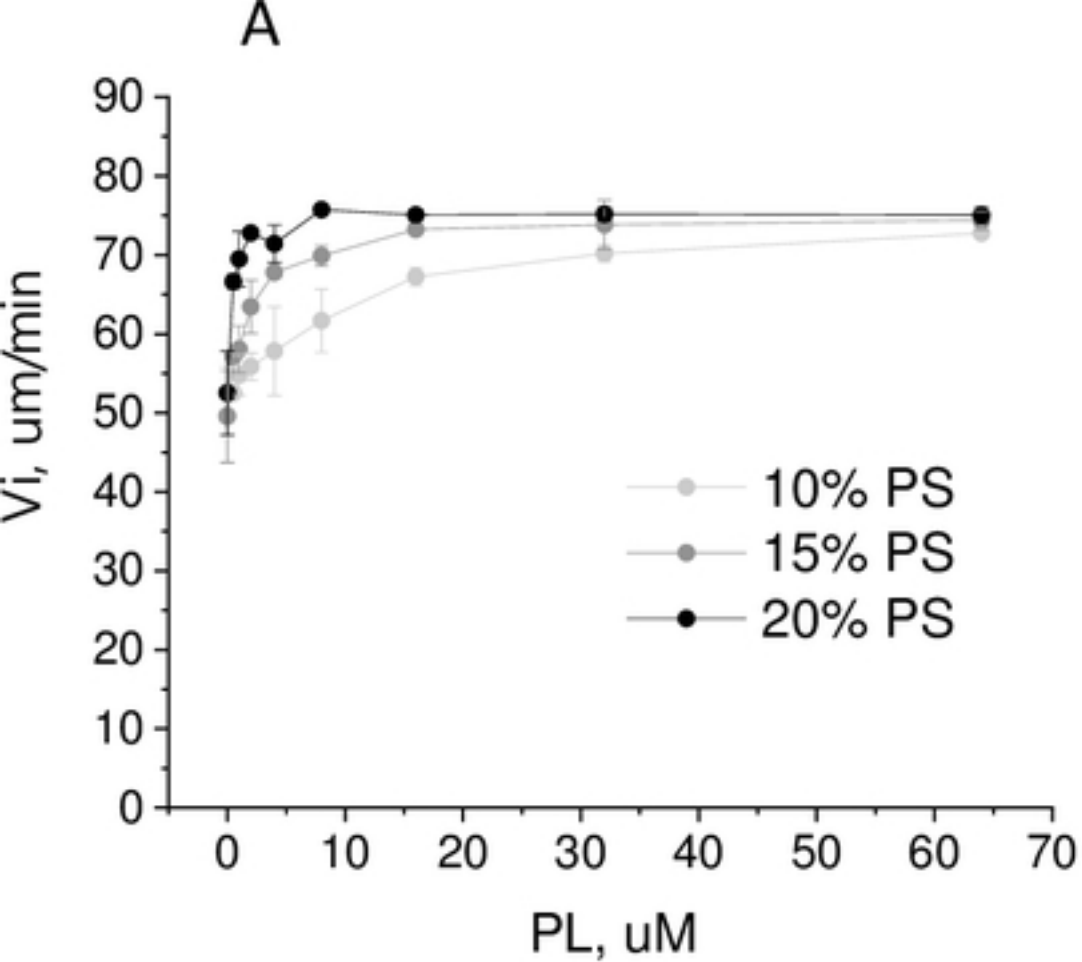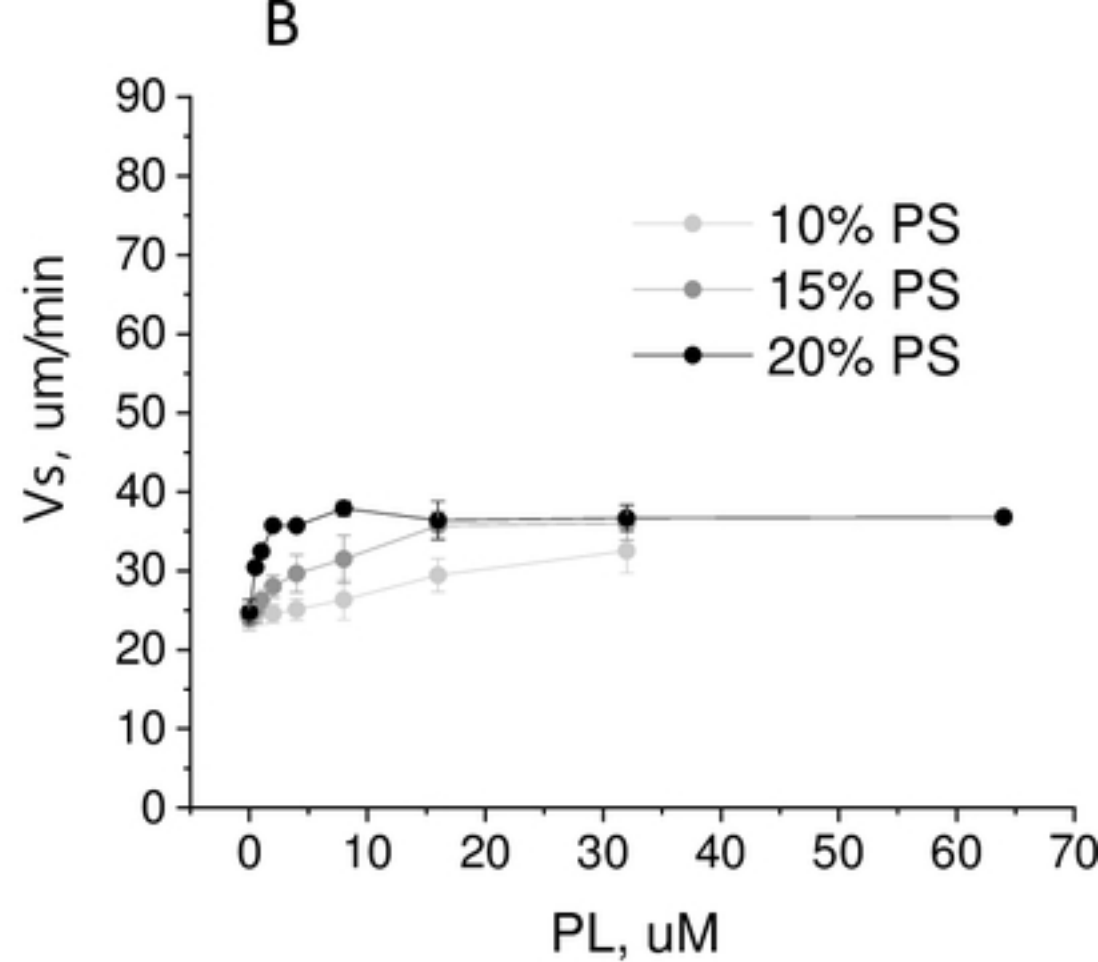

Figure
